# Supplementary material for: Black Raspberry Inhibits Oral Tumors in Mice Treated with the Tobacco Smoke Constituent Dibenzo(def,p)chrysene Via Genetic and Epigenetic Alterations
Source: Oxford University Press journal article supplement (doi:10.1158/1940-6207.capr-19-0496), 2020-01-22
Supplement: 19406207capr190496-sup-231483_2_supp_6007098_q3r4t8.xlsx [file 19406207capr190496-sup-231483_2_supp_6007098_q3r4t8.xlsx]

## Sheet: Sheet1
(A)
chr	start	end	strand	pvalue	qvalue	meth.diff	prom	exon	intron	dist.to.feature	feature.name	feature.strand	Gene
chr6	8356414	8356414	+	1.69e-07	1.28e-05	25.001	0	0	1	102748	NR_040452	-	A430035B10Rik
chr12	81745618	81745618	+	3.2e-06	0.000123744	25.0076	1	1	0	418	NM_026244	+	Slc39a9
chr17	47809972	47809972	+	0.000166958	0.00244764	25.0133	0	1	0	-14587	NR_045945	+	Tomm6os
chr18	76217598	76217598	+	4.63e-05	0.000956301	25.0378	0	0	1	40528	NR_045365	-	2900057B20Rik
chr7	111952842	111952842	+	0.000490599	0.00536921	25.0383	0	0	0	-26859	NM_001256973	-	Usp17le
chr7	77502970	77502970	+	9.06e-06	0.00027794	25.0406	0	1	0	2510	NM_009697	-	Nr2f2
chr13	118391304	118391304	+	1.79e-07	1.35e-05	25.0753	1	1	0	179	NM_010408	+	Hcn1
chr3	97045906	97045906	+	6.96e-05	0.0012863	25.0887	0	0	0	-14620	NM_029933	-	Bcl9
chr7	133103691	133103691	+	6.79e-08	6.32e-06	25.0909	0	0	1	122235	NM_001101488	-	Gsg1l
chr2	28770817	28770817	+	1.96e-13	2.23e-10	25.0959	0	1	0	1125	NM_019446	-	Barhl1
chr13	119112477	119112477	+	7.55e-11	2.82e-08	25.1259	0	0	0	63583	NM_021556	-	Mrps30
chr7	135831721	135831721	+	2.44e-06	9.93e-05	25.1462	0	0	1	52223	NM_145955	-	Mcmbp
chr3	101827303	101827303	+	1.83e-05	0.000473082	25.1667	0	0	0	13237	NM_178777	+	Nhlh2
chr2	101953765	101953765	+	3.11e-06	0.000121027	25.1934	0	1	0	72853	NM_001290784	-	Ldlrad3
chr10	21279758	21279758	+	0.000204051	0.00283744	25.2197	0	0	0	-33193	NR_027968	+	1700020N01Rik
chrX	72341372	72341372	+	0.000670854	0.00678235	25.2202	1	1	0	181	NM_001030307	+	Dkc1
chr12	113475297	113475297	+	2.02e-08	2.44e-06	25.2381	0	0	0	90880	NM_001097621	+	Kif26a
chr12	119221502	119221502	+	0.00099195	0.00893951	25.2588	0	1	0	139170	NM_146040	+	Cdca7l
chr6	58856649	58856649	+	0.000217066	0.00296961	25.2681	1	1	1	472	NM_021432	-	Nap1l5
chr13	3221223	3221223	+	2.66e-07	1.82e-05	25.2858	0	0	0	72504	NR_001581	+	Speer6-ps1
chr2	152451816	152451816	+	2.38e-07	1.68e-05	25.2924	1	0	0	-928	NM_009047	+	Rem1
chr19	21346380	21346380	+	2.46e-05	0.000590233	25.2933	1	0	0	-388	NM_009551	+	Zfand5
chr15	5093507	5093507	+	2.95e-05	0.000677912	25.2956	1	0	0	-354	NM_001013367	+	Prkaa1
chr17	56279673	56279673	+	3.8e-05	0.000822208	25.2976	1	1	0	94	NM_001130456	-	Sema6b
chr9	40120557	40120557	+	8.54e-08	7.55e-06	25.2987	0	0	1	-20500	NR_040728	+	1700110K17Rik
chr14	65425113	65425113	+	0.000164521	0.00242153	25.3348	0	1	0	143572	NM_177338	-	Hmbox1
chr4	135866862	135866862	+	5.77e-12	3.77e-09	25.3408	1	1	0	7	NM_001277123	+	Hnrnpr
chr6	39420342	39420342	+	9.11e-05	0.00156458	25.3413	0	1	0	-49975	NM_018810	-	Mkrn1
chr18	65243990	65243990	+	4.21e-07	2.59e-05	25.3468	0	0	1	60811	NM_031881	+	Nedd4l
chr11	59102645	59102645	+	1.28e-06	6.1e-05	25.3549	0	0	1	1609	NM_009522	-	Wnt3a
chr17	46590697	46590697	+	5.28e-09	8.36e-07	25.3605	0	0	1	-15272	NM_144856	-	Slc22a7
chr11	51243481	51243481	+	3.8e-08	4e-06	25.3838	0	0	1	140061	NM_153393	+	Col23a1
chr2	33497480	33497480	+	9.21e-07	4.74e-05	25.4065	1	0	1	769	NR_046275	+	C130021I20Rik
chr16	49369707	49369707	+	6.25e-06	0.000209437	25.4118	0	0	0	312110	NM_001166210	+	Myh15
chr11	97395989	97395989	+	1.12e-07	9.24e-06	25.4191	0	1	0	-34336	NM_001289118	-	4933428G20Rik
chr2	84555143	84555143	+	1.24e-05	0.000353206	25.4321	1	1	0	179	NM_144887	-	Zdhhc5
chr2	26758202	26758202	+	7.58e-05	0.00136786	25.4329	1	0	1	132	NM_009298	-	Surf6
chr5	115167535	115167535	+	5.65e-08	5.48e-06	25.4493	0	1	0	-1989	NR_105995	+	Mir7028
chr2	167924560	167924560	+	1.57e-12	1.34e-09	25.4509	0	1	0	18058	NM_021409	+	Pard6b
chrX	70232340	70232340	+	1.47e-06	6.79e-05	25.4511	1	0	0	-338	NM_009549	+	Zfp185
chr2	152533315	152533315	+	5.39e-07	3.15e-05	25.4634	0	1	0	20433	NM_025543	+	Mcts2
chr11	96207072	96207072	+	0.000467182	0.00516694	25.479	0	1	0	1991	NM_010458	+	Hoxb3
chr2	119148659	119148659	+	1.32e-05	0.000368432	25.5129	0	0	1	-2861	NM_019454	+	Dll4
chr7	5202100	5202100	+	3.36e-07	2.18e-05	25.513	0	0	0	30022	NM_001166734	+	Vmn1r57
chr1	104049027	104049027	+	1.38e-06	6.49e-05	25.5584	0	0	0	996684	NR_037989	+	Gm20268
chr15	96488617	96488617	+	2.03e-06	8.69e-05	25.5621	0	0	0	-15274	NM_001166458	-	Slc38a1
chrX	33084859	33084859	+	1.42e-06	6.64e-05	25.5751	0	0	0	140648	NM_001099325	+	Gm10488
chr11	98308675	98308675	+	3.51e-05	0.000772828	25.6008	1	0	1	529	NM_010346	+	Grb7
chrX	97016609	97016609	+	3.21e-08	3.5e-06	25.6018	1	1	0	203	NM_001081283	+	Tmem28
chr2	19475839	19475839	+	2.12e-08	2.54e-06	25.6322	1	0	0	-303	NM_027600	-	4921504E06Rik
chr1	135875816	135875816	+	3.12e-05	0.000705629	25.6357	0	0	0	-57839	NM_054077	-	Prelp
chr11	18098372	18098372	+	1.78e-05	0.00046549	25.6651	0	0	0	-244495	NM_026576	-	Etaa1
chr14	70343636	70343636	+	8.22e-06	0.000257157	25.6844	0	0	1	103424	NM_028526	+	Pebp4
chr7	103244692	103244692	+	2.39e-08	2.81e-06	25.6855	0	0	0	-114455	NM_011858	+	Tenm4
chr11	107002244	107002244	+	1.76e-06	7.79e-05	25.6958	0	0	0	-9009	NM_176850	-	Bptf
chr6	68172048	68172048	+	1.08e-10	3.7e-08	25.7131	0	0	0	-656356	NR_003100	-	4930515G16Rik
chr1	135567009	135567009	+	2.69e-05	0.000631437	25.7476	0	0	0	-9034	NM_001276767	-	Zc3h11a
chr2	11598029	11598029	+	4.25e-09	7.07e-07	25.7609	0	0	1	-28891	NM_001271497	+	Il15ra
chrX	11209301	11209301	+	6.43e-05	0.00121303	25.7787	0	0	0	304355	NM_001114529	+	Gm4906
chr11	118590599	118590599	+	1.21e-07	9.86e-06	25.7812	0	0	1	31757	NM_001285438	-	Rbfox3
chr4	154441659	154441659	+	3.2e-09	5.62e-07	25.8019	1	0	1	522	NM_001042407	+	Pex10
chr2	6642444	6642444	+	7.3e-05	0.00133407	25.8525	0	0	1	163599	NM_010160	-	Celf2
chr1	24183538	24183538	+	3.68e-09	6.29e-07	25.8577	1	0	0	-911	NM_007740	+	Col9a1
chr7	31658366	31658366	+	2.59e-05	0.000614737	25.858	0	1	0	5682	NM_009845	-	Cd22
chr5	125049185	125049185	+	7.11e-08	6.55e-06	25.8618	1	1	0	429	NM_026486	+	Tctn2
chr2	163116249	163116249	+	2.92e-06	0.000115144	25.8709	0	0	1	65061	NM_001098799	+	Tox2
chr6	136678056	136678056	+	1.49e-05	0.000405472	25.8757	0	0	1	52208	NM_001127318	-	Gucy2c
chr2	165189233	165189233	+	6.11e-07	3.46e-05	25.8895	0	0	0	-1615	NM_001005425	-	Zfp663
chr10	98713891	98713891	+	0.000264071	0.00341828	25.8934	0	0	0	-11974	NM_026268	+	Dusp6
chr1	43221089	43221089	+	5.31e-07	3.11e-05	25.895	1	0	1	-284	NM_010212	-	Fhl2
chr10	62328445	62328445	+	2.04e-05	0.000512557	25.9025	0	0	1	14318	NM_027384	-	Tet1
chr4	129807688	129807688	+	9.88e-05	0.00165933	25.9037	0	1	0	8108	NM_001163027	-	Hcrtr1
chr6	135881636	135881636	+	0.00041399	0.00475087	25.916	0	0	1	241894	NM_008171	-	Grin2b
chr8	128193930	128193930	+	9.25e-06	0.000282598	25.9298	1	1	0	214	NM_028908	+	Map10
chr11	11926188	11926188	+	5.26e-05	0.00104786	25.9439	0	0	1	1787	NM_001177629	-	Grb10
chr5	117735963	117735963	+	1.11e-10	3.78e-08	25.9507	0	0	1	1611	NM_018858	-	Pebp1
chr5	138944467	138944467	+	0.00011621	0.0018726	25.9632	0	0	0	61456	NM_029693	-	1700123K08Rik
chr2	118687914	118687914	+	0.000585713	0.00612707	25.973	1	0	1	180	NM_019826	+	Ivd
chr13	55102000	55102000	+	2.68e-09	4.87e-07	25.9809	0	0	1	20181	NM_001206391	-	Hk3
chr7	135831718	135831718	+	1.15e-06	5.67e-05	25.9927	0	0	1	52226	NM_145955	-	Mcmbp
chrX	131570440	131570440	+	6.26e-07	3.51e-05	26.0086	1	0	1	702	NR_040283	-	3632454L22Rik
chr1	120762547	120762547	+	1.14e-07	9.36e-06	26.0125	0	0	1	187650	NM_001081125	-	Gli2
chr8	87396548	87396548	+	0.000158337	0.00235535	26.0136	1	1	1	393	NM_001168244	+	Syce2
chr7	31573075	31573075	+	6.33e-06	0.000211431	26.0159	1	0	1	153	NM_001033131	+	Krtdap
chr19	5654934	5654934	+	4e-06	0.000146918	26.0224	0	1	0	8774	NM_001164568	-	Sipa1
chr16	30540661	30540661	+	1.28e-05	0.000360004	26.0229	0	0	1	10004	NM_172614	-	Tmem44
chr19	5954512	5954512	+	4.33e-05	0.000907876	26.0354	0	0	1	9695	NM_008893	-	Pola2
chr5	144961730	144961730	+	1.04e-05	0.000309597	26.0459	0	1	0	10577	NM_010800	+	Bhlha15
chr8	73026138	73026138	+	2.22e-16	1.02e-12	26.0536	0	0	1	4501	NM_025577	-	2810428I15Rik
chr8	78463360	78463360	+	4.54e-07	2.76e-05	26.0764	0	0	1	490769	NM_001164235	+	1700007B14Rik
chr8	74127691	74127691	+	5.05e-05	0.00101868	26.08	0	1	0	6148	NM_001166213	+	Fam129c
chr13	3348644	3348644	+	7.35e-05	0.00133914	26.0801	0	0	0	-128905	NR_015522	+	2810429I04Rik
chr12	77919386	77919386	+	0.000154156	0.00230844	26.087	0	0	1	4126	NM_134050	-	Rab15
chr9	28976996	28976996	+	1.18e-06	5.74e-05	26.1031	0	0	1	793719	NM_172290	-	Ntm
chr5	142816503	142816503	+	5.13e-07	3.03e-05	26.1333	0	0	0	-60948	NM_199068	+	Foxk1
chr2	19580616	19580616	+	4.21e-07	2.59e-05	26.1474	1	1	0	929	NM_027715	+	Otud1
chr15	37040496	37040496	+	0.00045357	0.00506218	26.1536	0	0	0	-103340	NM_026521	-	Zfp706
chrX	71213161	71213161	+	5.03e-05	0.00101621	26.1869	0	0	0	-1466	NM_008224	-	Hcfc1
chr7	73254812	73254812	+	6.18e-05	0.00117867	26.1869	1	1	0	413	NM_001081163	+	Chsy1
chr19	41970668	41970668	+	1.12e-05	0.000326173	26.1966	1	0	0	-26	NM_199447	-	Rrp12
chr4	107890109	107890109	+	1.46e-05	0.000400036	26.2222	1	0	1	419	NM_001167936	-	Zyg11a
chr14	67855260	67855260	+	6.44e-05	0.00121428	26.225	0	0	1	3133	NM_010095	+	Ebf2
chr13	55632992	55632992	+	8.17e-06	0.00025632	26.2372	0	1	0	-3094	NM_013739	-	Dok3
chr8	121892791	121892791	+	8.12e-07	4.28e-05	26.2436	0	0	0	24355	NM_024219	+	Hsbp1
chr15	83226740	83226740	+	3.73e-07	2.37e-05	26.2618	0	0	1	-29014	NR_027980	-	1700001L05Rik
chr7	115454323	115454323	+	1.82e-06	8.01e-05	26.266	0	0	0	-6087	NM_146736	+	Olfr491
chr15	37712399	37712399	+	1.36e-07	1.08e-05	26.2685	0	0	1	9357	NM_001170866	-	Ncald
chr19	41235856	41235856	+	1.85e-06	8.07e-05	26.2949	0	0	1	45409	NM_011904	-	Tll2
chr11	118624635	118624635	+	8.85e-06	0.00027241	26.3025	0	0	1	-2281	NM_001285438	-	Rbfox3
chr19	53217304	53217304	+	1.81e-07	1.35e-05	26.3036	1	1	1	60	NM_001164100	+	Add3
chr1	75189258	75189258	+	9.02e-07	4.67e-05	26.307	1	0	1	526	NR_051998	+	Ankzf1
chr15	102796446	102796446	+	2.24e-05	0.00054994	26.3467	1	0	0	-781	NM_010462	+	Hoxc10
chr14	70474112	70474112	+	7.2e-05	0.00131895	26.3509	0	0	0	-3140	NM_018781	+	Egr3
chr5	115994112	115994112	+	3.41e-10	9.27e-08	26.351	0	0	1	-15364	NM_007475	+	Rplp0
chr17	25881901	25881901	+	1.66e-06	7.49e-05	26.3631	0	0	1	8918	NM_177822	+	Mslnl
chr5	34679058	34679058	+	6.54e-08	6.11e-06	26.3669	1	1	0	21	NM_011278	+	Rnf4
chr7	75421326	75421326	+	3.41e-05	0.000756014	26.3727	1	0	1	155	NR_040340	-	Gm16157
chr11	85646998	85646998	+	1.01e-06	5.1e-05	26.3874	1	1	0	883	NM_009324	+	Tbx2
chr3	33698846	33698846	+	2.29e-07	1.63e-05	26.3925	1	0	0	-259	NM_001290500	+	Ttc14
chr17	49169249	49169249	+	1.28e-11	6.91e-09	26.4278	0	0	1	83610	NR_038145	-	1700008K24Rik
chr6	120165242	120165242	+	1.68e-11	8.58e-09	26.475	0	1	0	79336	NM_198884	-	B4galnt3
chrX	45806694	45806694	+	6.84e-07	3.75e-05	26.4778	0	0	1	9616	NM_019680	-	Elf4
chr5	120682248	120682248	+	8.16e-14	1e-10	26.5296	0	0	0	-92977	NR_045793	-	Gm10390
chr11	63737748	63737748	+	6.23e-08	5.92e-06	26.5303	0	0	0	-1963	NM_018805	-	Hs3st3b1
chrX	8777784	8777784	+	4.95e-09	7.95e-07	26.5306	1	1	0	687	NM_173414	+	Lancl3
chr11	72018554	72018554	+	1.87e-06	8.16e-05	26.5514	0	0	0	-1682	NM_028963	-	4933427D14Rik
chr11	120068207	120068207	+	3.2e-07	2.09e-05	26.559	0	0	0	-17038	NR_030682	-	2810410L24Rik
chr16	92543876	92543876	+	4.18e-07	2.58e-05	26.5613	0	0	0	45486	NM_172469	+	Clic6
chr4	146316396	146316396	+	0.000189341	0.00268437	26.5646	0	0	0	-79563	NM_001177767	+	Rex2
chrX	99700498	99700498	+	1.9e-11	9.41e-09	26.5772	1	0	0	-12	NM_027382	-	Hdac8
chr7	87238001	87238001	+	0.000265558	0.0034327	26.5837	0	0	0	-17859	NR_045695	-	Gm21057
chr15	76022493	76022493	+	1.7e-06	7.6e-05	26.5855	0	0	1	3648	NM_201394	-	Plec
chr7	80117582	80117582	+	7.89e-08	7.11e-06	26.6024	0	0	0	129373	NR_046024	-	Gm6567
chr8	34916235	34916235	+	8.35e-06	0.000260425	26.6148	0	0	1	-57994	NM_001206849	-	Smim18
chr5	115636220	115636220	+	8.26e-05	0.00145343	26.6355	1	0	0	-91	NM_013879	-	Cabp1
chr11	120494450	120494450	+	2.16e-07	1.56e-05	26.6363	1	0	1	412	NM_010756	-	Mafg
chr4	140221512	140221512	+	7.25e-08	6.62e-06	26.6609	1	0	1	291	NM_001290803	-	Arhgef10l
chrX	155970646	155970646	+	5.85e-09	9.13e-07	26.7011	1	1	0	48	NM_001033472	+	A830080D01Rik
chr2	120556449	120556449	+	8.58e-08	7.58e-06	26.7254	1	1	0	805	NM_026891	-	Cdan1
chrX	141939374	141939374	+	8.36e-07	4.38e-05	26.7346	0	0	0	-17193	NM_001290274	-	Amot
chr7	77502979	77502979	+	2.85e-06	0.000112627	26.7573	0	1	0	2501	NM_009697	-	Nr2f2
chr17	28686404	28686404	+	3.81e-09	6.45e-07	26.7807	1	0	0	-28	NM_001034871	+	Clpsl2
chr2	71877157	71877157	+	1.36e-08	1.79e-06	26.7845	0	0	1	-15517	NM_001204166	+	Rapgef4
chr2	92826640	92826640	+	8.36e-05	0.00146531	26.7943	0	0	1	-42865	NR_110333	+	4631405J19Rik
chr3	26683066	26683066	+	7.27e-08	6.64e-06	26.7953	0	0	1	146515	NM_027583	+	Spata16
chrX	97016601	97016601	+	1.57e-14	3.07e-11	26.8152	1	1	0	195	NM_001081283	+	Tmem28
chr16	14520459	14520459	+	3.19e-06	0.000123393	26.8578	0	0	0	-41951	NR_033556	+	A630010A05Rik
chr4	65209852	65209852	+	0.000122387	0.00194076	26.8643	0	0	1	-56168	NM_053084	+	Trim32
chr1	62812333	62812333	+	8.92e-11	3.17e-08	26.8795	0	0	1	28974	NR_040601	-	4930487H11Rik
chr15	73343983	73343983	+	9.43e-08	8.13e-06	26.9025	1	0	1	995	NM_001081066	+	Dennd3
chr4	122512045	122512045	+	9.52e-06	0.000289098	26.9122	0	0	0	-1425	NM_008917	+	Ppt1
chr8	3452226	3452226	+	1.92e-12	1.58e-09	26.9231	0	1	0	15423	NM_026951	-	Pex11g
chr8	119853051	119853051	+	6.17e-07	3.48e-05	26.9545	0	0	1	-20019	NM_028941	+	Cmip
chr7	53085549	53085549	+	3.04e-14	4.4e-11	26.9608	1	0	1	611	NM_153419	-	Grwd1
chr14	48783103	48783103	+	3.23e-09	5.65e-07	26.9694	0	0	1	-35288	NR_003630	+	Gm6498
chrX	83021878	83021878	+	5.55e-10	1.34e-07	26.9995	1	1	0	281	NM_008194	-	Gk
chr5	34162873	34162873	+	1.97e-05	0.000500155	27.0049	0	0	0	-22888	NM_001081102	+	Whsc1
chr10	80118864	80118864	+	2.78e-09	4.97e-07	27.0088	1	0	1	953	NM_145361	-	Btbd2
chr17	69190498	69190498	+	1.93e-05	0.000493453	27.019	0	1	0	4024	NM_001206661	+	Tmem200c
chr11	67395197	67395197	+	0.000257802	0.00335837	27.0251	0	0	1	-4805	NM_001109657	+	Gas7
chr5	78568541	78568541	+	4.45e-10	1.13e-07	27.027	0	0	0	-627769	NR_027806	-
chr5	142514218	142514218	+	0.000105972	0.0017552	27.0297	0	1	0	-363233	NM_199068	+	Foxk1
chr7	150155094	150155094	+	2.08e-06	8.84e-05	27.0677	1	1	0	76	NM_008554	-	Ascl2
chr2	113638741	113638741	+	5.32e-07	3.11e-05	27.0741	0	0	1	30508	NM_009162	-	Scg5
chr9	57385307	57385307	+	1.68e-06	7.54e-05	27.0848	1	0	0	-28	NM_175273	+	Fam219b
chr13	52382869	52382869	+	0.000213056	0.00292866	27.0877	0	0	0	190761	NR_045061	+	4921525O09Rik
chr4	147482290	147482290	+	7.92e-10	1.81e-07	27.0942	0	0	1	-20118	NM_001301281	-	Agtrap
chr4	126924558	126924558	+	3.19e-11	1.39e-08	27.1006	0	1	0	3532	NM_030252	+	Smim12
chr5	101102378	101102378	+	2.84e-07	1.91e-05	27.1018	1	0	1	898	NM_027978	-	Coq2
chr2	26186134	26186134	+	1.38e-10	4.55e-08	27.1081	0	0	1	10846	NM_001199147	+	Gpsm1
chr8	107783377	107783377	+	1.59e-05	0.000426404	27.142	0	1	0	-4325	NM_001271915	-	B3gnt9
chr8	27925716	27925716	+	1.24e-05	0.000353078	27.1962	0	1	0	9180	NR_045904	-	2310008N11Rik
chr11	52505290	52505290	+	2.32e-09	4.33e-07	27.2396	0	0	0	-72918	NM_177059	+	Fstl4
chrX	136812561	136812561	+	8.92e-09	1.27e-06	27.2411	0	0	0	-32926	NR_037208	+	Mir3475
chr7	20019929	20019929	+	2.17e-10	6.48e-08	27.2619	0	1	0	-13164	NR_073015	-	A930016O22Rik
chrX	136532629	136532629	+	5.41e-05	0.00106703	27.2651	1	0	1	506	NM_001172148	-	Rbm41
chr19	4113617	4113617	+	3.84e-09	6.47e-07	27.2687	0	1	0	7959	NM_001276284	-	Aip
chrX	101396398	101396398	+	2.06e-08	2.49e-06	27.2727	1	1	0	59	NM_001077354	-	C77370
chr17	6953402	6953402	+	0.000135536	0.00209148	27.2865	0	0	1	33728	NM_009510	-	Ezr
chr15	83596777	83596777	+	2.88e-10	8.09e-08	27.3024	0	0	0	-13676	NM_172610	+	Mpped1
chr15	32747054	32747054	+	4.46e-09	7.32e-07	27.3089	0	0	0	-103424	NM_008304	+	Sdc2
chr11	61038559	61038559	+	2.65e-07	1.82e-05	27.3161	0	0	0	16317	NM_007436	+	Aldh3a1
chr4	151700144	151700144	+	5.75e-07	3.31e-05	27.3212	1	0	1	311	NR_102292	+	Rpl22
chr1	135319469	135319469	+	2.15e-10	6.45e-08	27.3219	0	0	1	1321	NM_011439	-	Sox13
chrX	136812276	136812276	+	2.35e-14	3.61e-11	27.3241	0	0	0	-33211	NR_037208	+	Mir3475
chr4	130358918	130358918	+	1.69e-06	7.57e-05	27.3328	0	0	1	10468	NM_011520	+	Sdc3
chr7	38870990	38870990	+	1.59e-11	8.28e-09	27.3377	0	0	0	21520	NM_007633	-	Ccne1
chr5	142816524	142816524	+	1.03e-06	5.19e-05	27.3519	0	0	0	-60927	NM_199068	+	Foxk1
chr17	63553145	63553145	+	9.57e-06	0.000290117	27.3563	0	0	1	296785	NM_015794	-	Fbxl17
chr11	11926144	11926144	+	2.43e-07	1.7e-05	27.37	0	0	1	1831	NM_001177629	-	Grb10
chr1	94966526	94966526	+	2.77e-09	4.96e-07	27.3827	0	0	1	12532	NM_001294150	-	Kif1a
chr16	28884293	28884293	+	1.09e-05	0.00032041	27.3874	0	0	1	45492	NM_177718	-	Mb21d2
chr4	120770640	120770640	+	2.62e-07	1.8e-05	27.3921	1	1	0	209	NM_172700	-	Zmpste24
chr19	56375409	56375409	+	9.8e-08	8.35e-06	27.3956	0	0	1	12983	NM_146101	+	Habp2
chr7	120881700	120881700	+	1.04e-08	1.43e-06	27.4086	0	0	0	-27812	NM_145584	+	Spon1
chr2	113638785	113638785	+	6.72e-06	0.000221364	27.4354	0	0	1	30464	NM_009162	-	Scg5
chr2	71030643	71030643	+	0.000110096	0.0018079	27.4556	0	0	0	-19120	NM_001198876	+	Dync1i2
chr7	148275867	148275867	+	1.09e-06	5.45e-05	27.4755	0	0	1	10201	NM_019762	+	Pkp3
chrX	138156443	138156443	+	8.58e-07	4.47e-05	27.4818	0	1	0	3318	NM_010572	-	Irs4
chr11	61263942	61263942	+	2.27e-07	1.63e-05	27.5075	0	1	0	3553	NM_001291024	-	Rnf112
chr15	99256072	99256072	+	0.00010716	0.0017717	27.5124	0	1	0	32108	NM_001001884	-	Nckap5l
chr8	129549614	129549614	+	1.29e-05	0.000362194	27.5199	0	0	0	-38342	NM_033620	+	Pard3
chr5	77544068	77544068	+	3.48e-05	0.000767643	27.5991	1	1	0	81	NM_175606	-	Hopx
chrX	162878268	162878268	+	2.67e-05	0.00062745	27.6063	1	1	0	369	NM_177429	-	Ofd1
chr10	80721967	80721967	+	6.3e-12	4.01e-09	27.6067	0	1	0	1925	NM_001285854	+	Matk
chr6	134551359	134551359	+	7.42e-05	0.00134842	27.617	0	0	0	31148	NM_026345	-	Mansc1
chr2	174125595	174125595	+	1.07e-10	3.7e-08	27.6566	0	1	1	2237	NM_201618	+	Gnas
chr12	17734616	17734616	+	4.04e-06	0.000147937	27.6735	0	0	1	36998	NM_016677	+	Hpcal1
chr4	140347414	140347414	+	4.61e-08	4.65e-06	27.6789	0	1	0	-17297	NM_011061	-	Padi4
chr7	20074948	20074948	+	2.95e-12	2.14e-09	27.701	0	0	0	18733	NM_177692	-	Bloc1s3
chr14	44967261	44967261	+	1.02e-06	5.15e-05	27.7395	0	0	0	-152532	NM_198677	+	BC061237
chr7	105531925	105531925	+	1.09e-07	9.04e-06	27.7778	0	0	0	-22088	NM_001168539	-	Tsku
chr19	45735156	45735156	+	0.000127372	0.00199455	27.7784	1	0	0	-474	NM_013907	-	Fbxw4
chr12	114115673	114115673	+	1.21e-06	5.84e-05	27.7806	0	0	0	-16547	NM_019925	-	Gpr132
chr11	116223623	116223623	+	6.74e-05	0.00125473	27.847	0	1	0	-26956	NM_008240	-	Foxj1
chr6	5868054	5868054	+	1.94e-11	9.54e-09	27.8586	0	0	1	59340	NR_040255	-	1700019G24Rik
chr2	152533348	152533348	+	2.31e-12	1.79e-09	27.8608	0	1	0	20466	NM_025543	+	Mcts2
chr4	136296857	136296857	+	1.52e-05	0.000412077	27.871	0	0	1	95070	NM_001290753	-	Ephb2
chr12	110784119	110784119	+	2.51e-08	2.91e-06	27.8956	1	1	1	513	NR_003633	+	Meg3
chr13	60785406	60785406	+	5.61e-06	0.000191996	27.9212	0	0	1	81836	NM_134062	+	Dapk1
chr19	7054900	7054900	+	1.29e-08	1.72e-06	27.9241	1	1	0	31	NM_008020	-	Fkbp2
chrX	72341417	72341417	+	5.64e-05	0.00110091	27.9613	1	1	0	226	NM_001030307	+	Dkc1
chr8	127615449	127615449	+	6.93e-07	3.78e-05	27.9686	0	0	1	37356	NM_174854	+	Disc1
chr17	8658039	8658039	+	3.98e-07	2.49e-05	27.9897	0	0	0	30753	NM_009309	+	T
chr11	49772262	49772262	+	2.21e-11	1.05e-08	28.0381	0	0	1	56927	NM_029004	+	Rasgef1c
chr10	118360837	118360837	+	2.29e-09	4.3e-07	28.044	0	0	1	3363	NR_110482	-	Gm38403
chr5	31500587	31500587	+	1.02e-05	0.000304305	28.0442	0	0	1	3829	NM_001177901	-	Zfp513
chr15	36937377	36937377	+	2.09e-09	4e-07	28.0451	1	0	0	-221	NM_026521	-	Zfp706
chr7	87513527	87513527	+	0.000371054	0.00438372	28.0616	0	1	0	2735	NM_172903	-	Man2a2
chrX	13038762	13038762	+	9.24e-13	8.51e-10	28.0813	0	0	0	-6036	NM_173415	+	Nyx
chr5	106135709	106135709	+	2.98e-05	0.000684404	28.0904	0	0	1	5882	NM_178701	+	Lrrc8d
chr14	26277030	26277030	+	4.34e-10	1.11e-07	28.1603	0	0	0	-1641	NM_183208	+	Zmiz1
chr12	113475247	113475247	+	6e-15	1.28e-11	28.1722	0	0	0	90830	NM_001097621	+	Kif26a
chrX	7525106	7525106	+	1.25e-11	6.78e-09	28.1984	1	0	0	-92	NM_001130416	-	Hdac6
chr4	40215709	40215709	+	3.23e-06	0.000124406	28.1993	1	0	1	-903	NR_045265	+	Toporsos
chr8	74049435	74049435	+	1.73e-14	3.07e-11	28.2271	0	0	0	11902	NM_198095	-	Bst2
chr5	115891212	115891212	+	1.07e-05	0.000314857	28.2561	0	0	1	11520	NM_008629	+	Msi1
chr3	158360298	158360298	+	5.06e-09	8.1e-07	28.2994	0	0	0	-135114	NM_001291452	-	Lrrc7
chr5	135457407	135457407	+	5.49e-05	0.00107803	28.3239	0	0	0	-4677	NM_009902	+	Cldn3
chr12	4595735	4595735	+	7.79e-05	0.00139616	28.3272	0	0	0	-4079	NM_011365	+	Itsn2
chr2	143741034	143741034	+	2.26e-09	4.27e-07	28.3515	1	0	0	-33	NM_019771	+	Dstn
chr13	85790291	85790291	+	1.53e-05	0.000414409	28.372	0	0	0	-361201	NM_145452	-	Rasa1
chr4	46381292	46381292	+	1.33e-07	1.06e-05	28.3774	0	0	0	21004	NM_029086	-	5830415F09Rik
chr3	66777567	66777567	+	6.11e-06	0.000205829	28.4129	0	1	0	5167	NM_001302358	-	Shox2
chr1	122023256	122023256	+	1.27e-06	6.09e-05	28.4167	0	0	1	5494	NM_028439	+	3110009E18Rik
chr6	124668523	124668523	+	8.49e-11	3.09e-08	28.4341	1	0	0	-116	NR_029792	-	Mir200c
chr12	113054727	113054727	+	3.73e-08	3.96e-06	28.4749	0	0	1	2348	NM_026752	+	Zfyve21
chr11	109575863	109575863	+	4.46e-06	0.000160776	28.536	0	0	1	7708	NM_153782	-	Fam20a
chr10	79381689	79381689	+	6.77e-06	0.000222525	28.5626	0	0	1	1975	NM_053244	+	Kiss1r
chr11	57917640	57917640	+	2.51e-09	4.57e-07	28.5627	1	0	0	-15	NM_026949	+	Cnot8
chrX	102316253	102316253	+	1.12e-05	0.000327525	28.5714	1	1	0	520	NM_053201	+	Magee1
chrX	8777796	8777796	+	2.32e-10	6.82e-08	28.5805	1	1	0	699	NM_173414	+	Lancl3
chr2	166885621	166885621	+	4.85e-07	2.9e-05	28.5816	0	1	0	-2813	NM_001081005	+	1500012F01Rik
chr11	116317982	116317982	+	8.79e-09	1.26e-06	28.6225	0	0	0	-2322	NM_001033267	-	Qrich2
chr11	61038520	61038520	+	4.74e-06	0.000168099	28.6288	0	0	0	16278	NM_007436	+	Aldh3a1
chr2	84577242	84577242	+	1.16e-06	5.67e-05	28.6436	0	1	0	2883	NM_001005342	+	Ypel4
chr7	25379482	25379482	+	1.29e-05	0.000362146	28.6565	0	1	0	-6823	NM_001033205	-	Zfp575
chr3	83792792	83792792	+	1.57e-06	7.18e-05	28.6706	0	0	1	51292	NM_172681	-	D930015E06Rik
chr8	94889290	94889290	+	4.95e-07	2.95e-05	28.6875	0	0	0	7597	NM_018826	+	Irx5
chrX	131543554	131543554	+	3.55e-15	8.39e-12	28.7038	1	1	0	195	NM_175446	-	Zmat1
chr6	120152693	120152693	+	1.89e-07	1.4e-05	28.7167	0	0	0	91885	NM_198884	-	B4galnt3
chr17	56146712	56146712	+	5.82e-08	5.61e-06	28.7305	0	0	0	-1684	NM_145934	-	Stap2
chr5	119264253	119264253	+	1.64e-08	2.07e-06	28.7763	0	0	0	-138095	NR_040694	+	4930413E15Rik
chr2	151495808	151495808	+	3.05e-14	4.4e-11	28.8316	0	0	0	-1540	NM_001276400	-	Rad21l
chr4	63405844	63405844	+	2.59e-06	0.000104545	28.8333	1	1	0	304	NM_177371	-	Tnfsf15
chr7	54387671	54387671	+	4.55e-05	0.000943835	28.8442	1	1	1	298	NM_001163565	-	Ptpn5
chr2	73613558	73613558	+	9.28e-08	8.05e-06	28.8505	1	0	0	-156	NM_001113246	-	Chn1
chr18	37926429	37926429	+	1.87e-07	1.39e-05	28.8889	0	1	1	1197	NM_033595	+	Pcdhga12
chr2	71662206	71662206	+	2.43e-07	1.7e-05	28.9155	0	0	1	37212	NM_001277970	+	Itga6
chr4	140306395	140306395	+	6.11e-09	9.43e-07	29.0222	0	0	1	-7838	NM_153106	-	Padi6
chr7	134358351	134358351	+	4.14e-07	2.57e-05	29.0259	0	1	0	3231	NM_016754	+	Mylpf
chr11	78210741	78210741	+	5.45e-08	5.35e-06	29.0368	0	0	1	2756	NR_003282	+	Slc13a2os
chr5	143919255	143919255	+	6.68e-07	3.69e-05	29.0712	0	0	0	8176	NR_040426	-	Rbakdn
chr15	43787079	43787079	+	3.73e-06	0.000139616	29.0777	0	0	0	-85505	NM_175502	-	Tmem74
chr5	100508517	100508517	+	3.31e-06	0.000126791	29.0851	0	1	1	1538	NR_045993	+	Tmem150cos
chr11	94295343	94295343	+	4.54e-08	4.59e-06	29.0996	0	1	0	40170	NM_009783	-	Cacna1g
chr7	28247604	28247604	+	1.23e-05	0.000350935	29.1725	0	1	0	10169	NM_001290525	+	Blvrb
chr7	77502949	77502949	+	5.21e-08	5.15e-06	29.1784	0	1	0	2531	NM_009697	-	Nr2f2
chr11	20695056	20695056	+	5.36e-09	8.46e-07	29.181	0	0	0	36056	NM_173752	-	Lgalsl
chr5	34326335	34326335	+	8.08e-08	7.25e-06	29.1984	1	0	1	214	NM_001033458	+	Gm1673
chrX	102316258	102316258	+	7.97e-08	7.16e-06	29.2208	1	1	0	525	NM_053201	+	Magee1
chr7	82286803	82286803	+	0.000125651	0.00197505	29.2524	0	0	1	166470	NM_001109753	-	Sv2b
chr16	87730847	87730847	+	6.46e-11	2.48e-08	29.2969	0	1	0	31650	NM_007520	+	Bach1
chr8	123384653	123384653	+	5.35e-06	0.00018545	29.3063	0	0	0	122116	NM_001301811	+	Irf8
chr4	155221386	155221386	+	5.69e-05	0.00110954	29.3938	1	0	0	-40	NM_001302342	+	Dvl1
chrX	147604174	147604174	+	1.41e-09	2.9e-07	29.4329	0	0	0	-28447	NM_001271679	+	Wnk3
chr12	78340261	78340261	+	1.29e-05	0.00036269	29.4347	1	0	1	537	NR_045554	+	Fut8
chr11	51460434	51460434	+	2.79e-06	0.000110893	29.4463	0	0	1	-4022	NR_027958	+	D930048N14Rik
chr19	6384523	6384523	+	2.45e-10	7.13e-08	29.4665	1	1	0	96	NM_011224	+	Pygm
chr8	42070984	42070984	+	4.55e-05	0.000943394	29.4914	0	1	0	-31838	NR_015457	+	B430010I23Rik
chr15	78620985	78620985	+	9.28e-08	8.05e-06	29.5238	0	0	1	12488	NM_130859	-	Card10
chr1	35450647	35450647	+	2.45e-10	7.13e-08	29.6023	0	0	0	128832	NR_106129	-	Mir7669
chr1	93548653	93548653	+	4.79e-06	0.000169492	29.627	0	0	0	110998	NM_023046	+	Asb1
chr5	114923718	114923718	+	4.5e-07	2.74e-05	29.6376	0	0	0	29405	NM_023556	+	Mvk
chr5	125010105	125010105	+	7.33e-07	3.95e-05	29.667	0	0	1	7234	NM_001190795	+	Ddx55
chr11	119850965	119850965	+	1.47e-05	0.000401236	29.6733	0	0	1	-25116	NR_037225	+	Mir3065
chr18	38760654	38760654	+	8.5e-06	0.000264146	29.7634	1	0	1	269	NM_011898	-	Spry4
chr11	78210757	78210757	+	1.22e-06	5.9e-05	29.7735	0	0	1	2772	NR_003282	+	Slc13a2os
chr11	22872609	22872609	+	5.31e-11	2.09e-08	29.7739	1	1	1	606	NM_011663	+	Zrsr1
chr3	54615178	54615178	+	7.98e-10	1.82e-07	29.8435	0	0	0	-3466	NM_133231	-	Rfxap
chr11	11926155	11926155	+	6.46e-08	6.06e-06	29.8686	0	0	1	1820	NM_001177629	-	Grb10
chr2	168146738	168146738	+	2.41e-06	9.85e-05	29.8889	0	0	0	-51908	NM_001081134	-	Kcng1
chr8	63471666	63471666	+	1.19e-07	9.73e-06	29.8918	1	0	0	-324	NM_001293637	+	Nek1
chr19	28139821	28139821	+	3.96e-08	4.12e-06	29.8929	0	0	0	-54166	NM_011265	-	Rfx3
chr9	61819067	61819067	+	5.59e-06	0.000191639	29.9341	0	0	1	-24462	NM_024245	-	Kif23
chr7	107005240	107005240	+	2.51e-11	1.15e-08	29.9619	0	0	1	2154	NM_025668	-	Spcs2
chr1	136606233	136606233	+	7.6e-07	4.06e-05	29.997	0	0	1	62977	NM_009307	+	Syt2
chr4	141031597	141031597	+	6.53e-08	6.11e-06	29.9985	0	1	0	31011	NM_009541	+	Zbtb17
chr6	5868073	5868073	+	1.2e-10	4.02e-08	30.0454	0	0	1	59321	NR_040255	-	1700019G24Rik
chr4	135386642	135386642	+	2.94e-07	1.96e-05	30.0891	0	0	0	-25344	NM_001284196	+	Srsf10
chr11	102298872	102298872	+	9.14e-06	0.000280027	30.1231	0	1	0	7238	NM_008175	+	Grn
chr11	94295329	94295329	+	3.49e-07	2.24e-05	30.1277	0	1	0	40184	NM_009783	-	Cacna1g
chr14	70479532	70479532	+	1.56e-10	4.98e-08	30.1277	0	1	0	1932	NM_001289927	+	Egr3
chr8	122940485	122940485	+	1.41e-08	1.85e-06	30.134	0	0	0	-72281	NM_198671	+	Gse1
chr11	117122024	117122024	+	2.89e-12	2.11e-09	30.1446	0	0	1	-5536	NM_001113487	+	2016-09-09
chr19	56981355	56981355	+	6.03e-06	0.000203727	30.1706	0	1	0	32451	NM_172840	+	Vwa2
chr2	152156849	152156849	+	5.77e-08	5.59e-06	30.1871	0	0	1	1313	NM_001083921	-	Rbck1
chr2	157054701	157054701	+	1.67e-07	1.28e-05	30.1894	0	0	1	-24432	NM_001139516	-	Rbl1
chr10	85758863	85758863	+	6.07e-06	0.000204627	30.2136	0	0	1	-4294	NM_011595	+	Timp3
chr15	75955768	75955768	+	2.22e-12	1.75e-09	30.2158	0	1	0	1219	NM_001142968	-	BC024139
chr1	99992819	99992819	+	2.29e-06	9.46e-05	30.2488	1	0	0	-611	NM_013626	-	Pam
chr12	3947806	3947806	+	2.52e-05	0.000600742	30.2937	0	0	0	-7139	NM_008895	+	Pomc
chr4	146316420	146316420	+	3.95e-05	0.00084645	30.3001	0	0	0	-79539	NM_001177767	+	Rex2
chr17	6958347	6958347	+	5.67e-14	7.36e-11	30.3013	0	1	0	28783	NM_009510	-	Ezr
chrX	102316228	102316228	+	4.32e-06	0.000156524	30.3571	1	1	0	495	NM_053201	+	Magee1
chr12	106288634	106288634	+	2.53e-07	1.75e-05	30.3797	0	0	0	17737	NM_028419	+	Glrx5
chr17	27442222	27442222	+	1.34e-07	1.07e-05	30.4215	0	0	0	11819	NR_106073	-	Mir7214
chr11	4646976	4646976	+	3.1e-07	2.03e-05	30.4304	1	0	0	-196	NM_138948	-	Cabp7
chr1	4847712	4847712	+	3.49e-09	6.03e-07	30.4333	1	0	0	-63	NM_001159750	+	Tcea1
chr5	125049189	125049189	+	1.48e-09	3e-07	30.48	1	1	0	433	NM_026486	+	Tctn2
chr3	145947948	145947948	+	4.07e-05	0.000867058	30.5056	0	1	0	64025	NM_022983	+	Lpar3
chr4	32327026	32327026	+	2.09e-07	1.52e-05	30.5345	0	0	0	-177384	NM_001109661	+	Bach2
chr4	8916215	8916215	+	6.6e-09	1e-06	30.5435	0	0	0	-280249	NM_028940	+	Clvs1
chr11	78076214	78076214	+	6.06e-07	3.44e-05	30.5598	1	1	0	960	NM_001002004	+	2610507B11Rik
chr8	89755036	89755036	+	1.93e-07	1.43e-05	30.5638	0	0	0	-31288	NR_040697	-	Gm10637
chr11	66338966	66338966	+	2.08e-05	0.000520603	30.6882	1	1	0	663	NM_001034874	-	Shisa6
chr8	122732096	122732096	+	2.72e-07	1.85e-05	30.8006	0	0	1	20035	NR_110496	-	A330074K22Rik
chr4	153348736	153348736	+	8.29e-07	4.35e-05	30.8762	1	1	0	455	NM_007859	-	Dffb
chr18	74623827	74623827	+	2.57e-06	0.000103794	30.8772	0	0	1	21556	NM_201600	+	Myo5b
chr1	157079623	157079623	+	4.59e-09	7.53e-07	30.904	0	0	0	73792	NM_021433	+	Stx6
chr2	174125583	174125583	+	3.65e-13	3.78e-10	30.9083	0	1	1	2225	NM_201618	+	Gnas
chr1	93262739	93262739	+	3.66e-09	6.27e-07	30.9092	1	0	0	-268	NM_173395	+	Fam132b
chr5	118447620	118447620	+	2.69e-09	4.88e-07	30.9259	0	0	1	20843	NM_145564	+	Fbxo21
chr4	41659330	41659330	+	4.62e-08	4.65e-06	30.9565	0	1	0	1220	NM_027278	-	Rpp25l
chr6	134995229	134995229	+	3.73e-09	6.35e-07	30.9753	0	0	0	-20451	NM_181444	+	Gprc5a
chr4	149063180	149063180	+	3.65e-08	3.91e-06	30.9932	0	0	1	9638	NM_008840	-	Pik3cd
chr9	107472724	107472724	+	1.58e-08	2.03e-06	31.0001	0	1	0	1232	NM_010489	+	Hyal2
chr4	127847886	127847886	+	3.9e-07	2.44e-05	31.016	0	0	1	-3676	NM_029137	-	Csmd2os
chr5	114582280	114582280	+	6.1e-08	5.81e-06	31.0411	0	1	0	1117	NM_011677	+	Ung
chr2	90924789	90924789	+	6.81e-11	2.59e-08	31.0924	0	0	0	-12165	NM_011355	+	Spi1
chr8	123779989	123779989	+	1.48e-06	6.84e-05	31.1435	0	0	0	128406	NM_008024	+	Foxl1
chr8	91567558	91567558	+	3.33e-13	3.56e-10	31.2112	1	0	1	504	NM_021390	-	Sall1
chr1	180564884	180564884	+	1.87e-10	5.72e-08	31.22	0	0	1	105630	NM_001161665	+	Kif26b
chr2	13714594	13714594	+	2.28e-07	1.63e-05	31.2203	1	0	1	554	NM_145838	-	St8sia6
chr15	100587731	100587731	+	8.37e-11	3.07e-08	31.2261	0	0	0	-4447	NM_021530	+	Slc4a8
chr1	94577626	94577626	+	7.64e-05	0.00137712	31.2268	0	0	0	-32209	NM_153114	-	Otos
chr15	74564764	74564764	+	1.67e-06	7.5e-05	31.2637	1	0	0	-22	NM_026671	-	Lypd2
chr1	156876367	156876367	+	4.13e-11	1.7e-08	31.2743	0	0	0	70400	NM_010500	-	Ier5
chr10	70700675	70700675	+	8.96e-12	5.36e-09	31.489	1	1	0	118	NM_009360	-	Tfam
chr14	55733943	55733943	+	2.83e-07	1.91e-05	31.5068	0	1	0	1830	NM_177049	-	Jph4
chr8	124031208	124031208	+	7e-06	0.000227997	31.5091	0	0	0	34647	NM_029597	-	1700018B08Rik
chr11	102298839	102298839	+	6.85e-07	3.75e-05	31.5146	0	1	0	7205	NM_008175	+	Grn
chrX	136812547	136812547	+	3.65e-10	9.68e-08	31.637	0	0	0	-32940	NR_037208	+	Mir3475
chr3	40487349	40487349	+	3.21e-06	0.00012397	31.7087	0	1	0	-25444	NM_178386	+	Slc25a31
chr2	71030660	71030660	+	5.39e-06	0.000186455	31.7144	0	0	0	-19103	NM_001198876	+	Dync1i2
chr7	108028568	108028568	+	1.15e-07	9.44e-06	31.7342	0	1	0	2356	NR_037289	-	Mir3102
chr10	60391059	60391059	+	7.71e-09	1.14e-06	31.7781	0	1	0	5290	NR_105835	+	Mir6408
chr5	130499202	130499202	+	5.8e-07	3.33e-05	31.7944	1	0	1	1000	NM_133768	-	Asl
chr5	127724730	127724730	+	2.22e-15	6.2e-12	31.8498	0	0	1	2536	NM_175432	+	Tmem132c
chr15	8464741	8464741	+	1.5e-10	4.81e-08	31.8516	0	0	0	-70279	NM_027707	-	Nipbl
chr11	11926175	11926175	+	6.54e-09	9.95e-07	31.877	0	0	1	1800	NM_001177629	-	Grb10
chrX	136812558	136812558	+	1.47e-11	7.8e-09	31.9655	0	0	0	-32929	NR_037208	+	Mir3475
chr1	174452796	174452796	+	2.71e-08	3.09e-06	31.9927	0	0	1	1537	NM_027972	+	Cfap45
chr3	94933485	94933485	+	5.51e-08	5.39e-06	32.0193	0	0	0	4450	NM_027013	-	Scnm1
chr11	22872602	22872602	+	1.15e-12	1.03e-09	32.0303	1	1	1	599	NM_011663	+	Zrsr1
chr4	46381279	46381279	+	4.94e-10	1.22e-07	32.0708	0	0	0	21017	NM_029086	-	5830415F09Rik
chr11	22872581	22872581	+	1.47e-10	4.75e-08	32.0945	1	1	1	578	NM_011663	+	Zrsr1
chrX	33652195	33652195	+	1.13e-06	5.58e-05	32.1325	1	1	0	63	NM_133990	+	Il13ra1
chr17	23660185	23660185	+	8.14e-06	0.000255733	32.1709	0	0	0	-27581	NR_126485	+	6330415G19Rik
chr7	31604791	31604791	+	4.37e-11	1.77e-08	32.2117	0	1	0	1206	NM_001168512	-	Ffar2
chr6	39420353	39420353	+	4.74e-07	2.85e-05	32.3501	0	1	0	-49986	NM_018810	-	Mkrn1
chr7	29547083	29547083	+	5.54e-08	5.41e-06	32.4311	0	1	0	4461	NM_010908	-	Nfkbib
chr19	5654887	5654887	+	9.56e-08	8.21e-06	32.5197	0	1	0	8821	NM_001164568	-	Sipa1
chr12	77224123	77224123	+	1.85e-10	5.69e-08	32.5503	0	0	1	54124	NM_207707	-	Esr2
chr1	37486907	37486907	+	1.62e-07	1.24e-05	32.5832	1	1	0	42	NM_198006	-	Coa5
chr11	58886856	58886856	+	6.6e-11	2.52e-08	32.7077	0	1	0	63022	NM_001171512	-	Obscn
chr7	87680514	87680514	+	1.07e-08	1.47e-06	32.7571	1	0	0	-510	NM_001042527	-	Blm
chr1	121959787	121959787	+	2.8e-07	1.89e-05	32.8428	0	1	0	10571	NM_019432	-	Tmem37
chrX	162878239	162878239	+	1.63e-07	1.25e-05	32.9985	1	1	0	398	NM_177429	-	Ofd1
chr19	56981336	56981336	+	1.76e-07	1.33e-05	33.0892	0	1	0	32432	NM_172840	+	Vwa2
chr7	152047406	152047406	+	3.44e-14	4.84e-11	33.098	1	1	0	117	NM_010202	+	Fgf4
chrX	45806717	45806717	+	1.15e-12	1.03e-09	33.1281	0	0	1	9593	NM_019680	-	Elf4
chr4	141160491	141160491	+	3.55e-10	9.47e-08	33.1376	0	0	1	1477	NM_133754	-	Fblim1
chr3	58458330	58458330	+	2.47e-08	2.88e-06	33.1397	0	0	0	2368	NR_004433	+	Gm8234
chr18	78135003	78135003	+	1.4e-13	1.7e-10	33.2947	1	0	0	-203	NM_001195633	+	Epg5
chr8	36696316	36696316	+	5.66e-07	3.27e-05	33.4118	0	0	1	-44243	NR_040376	-	Gm16793
chr7	52928305	52928305	+	8.37e-07	4.38e-05	33.4664	0	0	0	-6542	NM_001271993	-	Fut2
chr8	9800166	9800166	+	2.31e-11	1.07e-08	33.4734	0	0	0	-29144	NM_173446	-	Fam155a
chr11	84456119	84456119	+	3.71e-06	0.000139156	33.5523	0	0	0	77816	NR_046197	-	1700109G15Rik
chrX	45806708	45806708	+	2.99e-10	8.36e-08	33.6634	0	0	1	9602	NM_019680	-	Elf4
chr4	130126736	130126736	+	1.85e-10	5.69e-08	33.7416	0	0	1	1033	NM_025998	+	Nkain1
chr2	163201924	163201924	+	9.87e-08	8.38e-06	33.8382	0	1	0	21786	NM_021566	-	Jph2
chr10	116472310	116472310	+	2e-07	1.46e-05	34.0022	0	0	0	-10087	NM_146242	+	Lrrc10
chr5	115167562	115167562	+	1.18e-11	6.51e-09	34.0529	0	1	0	-1962	NR_105995	+	Mir7028
chr12	77709851	77709851	+	1.7e-06	7.6e-05	34.0741	0	0	1	-60940	NR_046044	-	AI463170
chr3	96208656	96208656	+	4.55e-15	1.02e-11	34.112	0	0	0	10101	NR_001579	-	Terc
chr3	51364503	51364503	+	1.89e-09	3.67e-07	34.1142	1	1	1	243	NM_080793	-	Setd7
chr7	106222686	106222686	+	1.76e-10	5.47e-08	34.1176	0	0	1	66969	NM_178635	-	Uvrag
chr12	113371891	113371891	+	3.96e-08	4.12e-06	34.1511	0	0	0	2802	NR_029590	+	Mir203
chr10	79594923	79594923	+	0	0	34.1784	0	1	0	5210	NM_001195268	-	Cbarp
chr7	152014445	152014445	+	7.95e-12	4.85e-09	34.1823	0	0	0	-10072	NM_008007	+	Fgf3
chr8	123519561	123519561	+	1.1e-06	5.47e-05	34.2593	0	0	0	87372	NR_045471	-	Fendrr
chr3	95526259	95526259	+	1.5e-09	3.03e-07	34.3023	0	0	0	12638	NR_105981	-	Mir7014
chrX	71330471	71330471	+	1.02e-08	1.41e-06	34.3372	1	0	1	559	NM_001081979	-	Mecp2
chr8	119589649	119589649	+	2.84e-08	3.2e-06	34.3899	0	1	0	16701	NM_029686	-	Pkd1l2
chr4	119165033	119165033	+	2.63e-08	3.03e-06	34.4132	1	1	0	171	NM_177572	-	Rimkla
chr18	61301346	61301346	+	5.79e-08	5.59e-06	34.5693	0	1	0	24226	NR_105949	+	Mir6983
chr2	168374939	168374939	+	6.22e-07	3.49e-05	34.5791	0	0	1	40927	NM_010899	-	Nfatc2
chr2	165189273	165189273	+	1.29e-10	4.31e-08	34.7167	0	0	0	-1655	NM_001005425	-	Zfp663
chr8	76191589	76191589	+	1.34e-11	7.17e-09	34.8401	0	0	0	-315135	NM_010687	-	Large
chr5	125010078	125010078	+	2.4e-11	1.1e-08	34.8434	0	0	1	7207	NM_001190795	+	Ddx55
chrX	45806720	45806720	+	3.52e-11	1.51e-08	34.8522	0	0	1	9590	NM_019680	-	Elf4
chr5	93371826	93371826	+	8.77e-11	3.14e-08	34.936	0	1	0	44809	NM_001077596	+	Shroom3
chr3	40487336	40487336	+	3.68e-07	2.34e-05	34.9696	0	1	0	-25457	NM_178386	+	Slc25a31
chr3	96628764	96628764	+	1.7e-14	3.07e-11	34.9979	0	0	1	4511	NM_001163496	-	Cd160
chr17	80062330	80062330	+	3.49e-13	3.66e-10	35.0583	0	0	1	48092	NM_201361	+	Rmdn2
chr1	180564894	180564894	+	1.65e-14	3.07e-11	35.098	0	0	1	105640	NM_001161665	+	Kif26b
chr17	48073306	48073306	+	6.65e-08	6.22e-06	35.1142	0	0	0	-11726	NM_001110825	-	Foxp4
chr16	22920361	22920361	+	1.26e-06	6.04e-05	35.1339	1	1	1	68	NM_001083904	+	Fetub
chr9	87627534	87627534	+	0	0	35.2259	0	0	0	-1440	NM_023814	-	Tbx18
chr16	29823093	29823093	+	6.29e-08	5.96e-06	35.303	0	0	0	156118	NR_037689	-	Gm1968
chr17	66199351	66199351	+	2.73e-11	1.23e-08	35.3394	0	1	0	34913	NM_001198949	-	Ralbp1
chrX	102316312	102316312	+	5.97e-09	9.28e-07	35.4541	1	1	0	579	NM_053201	+	Magee1
chr2	130461693	130461693	+	4.44e-16	1.95e-12	35.5146	0	1	0	-5920	NM_001255993	-	Ubox5
chrX	57656328	57656328	+	1.11e-16	6.82e-13	35.5173	1	0	1	829	NM_001037863	-	Atp11c
chr7	87513510	87513510	+	8.51e-06	0.000264487	35.5616	0	1	0	2752	NM_172903	-	Man2a2
chr4	120029167	120029167	+	2.26e-10	6.68e-08	35.5641	0	0	0	-48719	NM_001159630	+	Scmh1
chr18	37845122	37845122	+	2.16e-12	1.73e-09	35.6353	1	1	1	70	NM_033587	+	Pcdhga4
chr12	71926968	71926968	+	2.64e-10	7.6e-08	35.6733	1	0	1	469	NM_028127	+	Frmd6
chr5	135517994	135517994	+	3.01e-07	1.99e-05	35.7273	0	1	0	18554	NM_016801	+	Stx1a
chr5	77544047	77544047	+	1.3e-10	4.33e-08	35.7275	1	1	0	102	NM_175606	-	Hopx
chr7	134358364	134358364	+	1.67e-11	8.53e-09	36.088	0	0	1	3244	NM_016754	+	Mylpf
chr5	77544059	77544059	+	9.61e-10	2.14e-07	36.4972	1	1	0	90	NM_175606	-	Hopx
chr5	74020853	74020853	+	1.52e-12	1.31e-09	36.5128	0	1	0	2808	NM_153568	-	Lrrc66
chr6	121121186	121121186	+	7.66e-10	1.76e-07	36.5282	0	0	0	-12499	NM_028730	+	Pex26
chr3	85255110	85255110	+	1.39e-10	4.56e-08	36.5583	0	0	0	-122941	NM_144896	+	Gatb
chr4	40249371	40249371	+	9.51e-12	5.51e-09	36.7253	0	0	0	-10894	NR_040663	+	4930509K18Rik
chrX	102316218	102316218	+	3.35e-07	2.18e-05	36.9594	1	1	0	485	NM_053201	+	Magee1
chr19	56981313	56981313	+	2.01e-08	2.44e-06	37.0871	0	1	0	32409	NM_172840	+	Vwa2
chr2	168155991	168155991	+	5.62e-08	5.48e-06	37.238	0	0	0	-61161	NM_001081134	-	Kcng1
chr15	103139451	103139451	+	2.47e-07	1.72e-05	37.8761	0	1	0	1419	NM_030720	-	Gpr84
chr8	74127673	74127673	+	8.36e-09	1.22e-06	37.8863	0	1	0	6130	NM_001166213	+	Fam129c
chr3	152592314	152592314	+	1.61e-14	3.07e-11	37.9293	0	0	1	52858	NM_012028	-	St6galnac5
chr6	30419721	30419721	+	1.22e-15	4.17e-12	37.9653	0	0	0	39986	NM_178625	-	Tmem209
chr15	101770516	101770516	+	6.31e-13	6.25e-10	37.9808	1	1	0	240	NM_146063	-	Krt79
chr1	91478372	91478372	+	1.05e-12	9.62e-10	37.9989	0	0	1	102096	NR_015540	-	4933400F21Rik
chr3	40487340	40487340	+	5.34e-08	5.25e-06	38.2539	0	1	0	-25453	NM_178386	+	Slc25a31
chr15	96020506	96020506	+	1.21e-07	9.83e-06	38.3039	0	0	1	7277	NR_028311	+	Gm4371
chrX	56387997	56387997	+	9.17e-08	7.98e-06	38.5915	1	0	1	-385	NM_010200	-	Fgf13
chr6	8907404	8907404	+	3.34e-10	9.12e-08	38.6197	0	0	1	7387	NM_008751	+	Nxph1
chr7	134129900	134129900	+	4.81e-12	3.2e-09	38.6274	0	0	0	10474	NM_026638	+	Cdipt
chr2	30349267	30349267	+	2.78e-15	7.31e-12	38.7384	0	0	0	-19549	NM_030244	-	Ier5l
chr17	15217571	15217571	+	1.15e-10	3.88e-08	39.8199	0	0	0	27550	NM_001034891	+	Ermard
chrX	71167803	71167803	+	4.33e-08	4.43e-06	40.3854	1	0	1	-521	NM_001177965	-	Naa10
chrX	72341376	72341376	+	7.55e-11	2.82e-08	40.9244	1	1	0	185	NM_001030307	+	Dkc1
chr15	73017824	73017824	+	2.47e-12	1.88e-09	41.1379	0	0	0	-2448	NM_153178	-	Ago2
chr17	25785739	25785739	+	4.55e-15	1.02e-11	41.3958	0	0	1	-68378	NM_022422	+	Gng13
chr2	90924759	90924759	+	2.22e-16	1.02e-12	41.7056	0	0	0	-12195	NM_011355	+	Spi1
chr6	30419709	30419709	+	0	0	41.7156	0	0	0	39998	NM_178625	-	Tmem209
chr7	144501362	144501362	+	4.9e-10	1.22e-07	41.7186	0	0	1	4767	NM_001113414	-	Ebf3
chr8	111411354	111411354	+	9.66e-09	1.35e-06	41.7316	0	0	1	-49406	NR_037295	+	Mir3108
chr5	122548388	122548388	+	1.55e-15	4.62e-12	41.8182	0	0	0	-2601	NM_010861	+	Myl2
chr11	102298851	102298851	+	4.29e-10	1.1e-07	42.2864	0	1	0	7217	NM_008175	+	Grn
chr10	79247243	79247243	+	3.97e-10	1.04e-07	42.7335	0	1	0	4488	NM_001042710	-	Prss57
chr9	40128878	40128878	+	5.16e-14	6.8e-11	42.7782	0	0	1	-12179	NR_040728	+	1700110K17Rik
chr3	40487307	40487307	+	1.61e-09	3.21e-07	43.5661	0	1	0	-25486	NM_178386	+	Slc25a31
chr8	94889296	94889296	+	3.45e-12	2.45e-09	43.6233	0	0	0	7603	NM_018826	+	Irx5
chr2	26186137	26186137	+	5.66e-15	1.24e-11	45.3259	0	0	1	10849	NM_001199147	+	Gpsm1
chr11	78210759	78210759	+	1.33e-15	4.23e-12	46.7226	0	0	1	2774	NR_003282	+	Slc13a2os
