# Supplementary material for: Black Raspberry Inhibits Oral Tumors in Mice Treated with the Tobacco Smoke Constituent Dibenzo(def,p)chrysene Via Genetic and Epigenetic Alterations
Source: Oxford University Press journal article supplement (doi:10.1158/1940-6207.capr-19-0496), 2020-01-22
Supplement: 19406207capr190496-sup-231483_2_supp_6007099_q3r4t8.xlsx [file 19406207capr190496-sup-231483_2_supp_6007099_q3r4t8.xlsx]

## Sheet: Sheet1
(B)
chr	start	end	strand	pvalue	qvalue	meth.diff	prom	exon	intron	dist.to.feature	feature.name	feature.strand	Gene
chr10	80298264	80298264	+	1.72e-14	3.07e-11	-50.2349	0	1	0	6724	NR_035503	+	Mir1982
chrX	149933196	149933196	+	1.66e-11	8.53e-09	-50.1367	1	1	0	423	NM_018798	+	Ubqln2
chrX	149933203	149933203	+	4.82e-12	3.2e-09	-50.1025	1	1	0	430	NM_018798	+	Ubqln2
chr7	19890280	19890280	+	1.11e-16	6.82e-13	-49.9053	0	1	0	5115	NM_008036	-	Fosb
chr9	106374098	106374098	+	1.58e-13	1.84e-10	-49.4272	0	1	0	4885	NM_145619	-	Parp3
chr2	25147545	25147545	+	6.88e-13	6.54e-10	-48.5601	1	1	1	807	NM_001242940	+	Grin1os
chr2	38367125	38367125	+	2.22e-16	1.02e-12	-47.6157	1	0	0	-92	NM_021606	+	Nek6
chr4	134953955	134953955	+	1.23e-11	6.7e-09	-44.0557	1	1	0	188	NM_001168500	-	Ncmap
chr5	37187901	37187901	+	1.11e-16	6.82e-13	-43.6989	1	1	0	93	NM_026242	-	Mrfap1
chr4	140416383	140416383	+	5.55e-16	2.13e-12	-43.4615	0	0	0	-12225	NR_040654	+	4930515B02Rik
chr17	25018358	25018358	+	8.43e-12	5.08e-09	-43.4305	0	1	0	2645	NM_008340	+	Igfals
chrX	49034490	49034490	+	6e-12	3.86e-09	-43.261	1	1	0	290	NM_001077202	-	Hs6st2
chr5	37187904	37187904	+	2.32e-14	3.61e-11	-43.2426	1	1	0	90	NM_026242	-	Mrfap1
chr1	183283231	183283231	+	2.89e-15	7.39e-12	-43.0659	1	1	0	474	NM_028408	+	Cnih3
chr3	59600397	59600397	+	5.55e-16	2.13e-12	-42.5391	0	0	0	-64576	NM_001243003	+	Gm8298
chr7	148653389	148653389	+	3.53e-10	9.46e-08	-41.6992	1	1	1	130	NM_001111049	+	Cd151
chr16	18625237	18625237	+	6.99e-12	4.41e-09	-41.4921	0	0	1	-2742	NM_001001999	-	Gp1bb
chr4	151616014	151616014	+	5.88e-11	2.29e-08	-41.3475	0	0	1	-32457	NM_178406	+	Gpr153
chr7	31140978	31140978	+	0	0	-41.071	0	1	0	6814	NM_175478	-	Lrfn3
chr4	69090169	69090169	+	5.01e-14	6.69e-11	-41.039	0	0	0	-474739	NM_019967	-	Brinp1
chr7	80521276	80521276	+	2.55e-15	6.92e-12	-41.0101	1	0	1	-617	NR_040324	-	A730056A06Rik
chr12	77673839	77673839	+	7.93e-08	7.14e-06	-40.9367	0	0	1	-24928	NR_046044	-	AI463170
chr8	111227929	111227929	+	1.95e-09	3.76e-07	-40.8492	0	0	0	-10615	NM_007496	+	Zfhx3
chrX	149933224	149933224	+	1.67e-07	1.27e-05	-39.4366	1	1	0	451	NM_018798	+	Ubqln2
chr7	149660993	149660993	+	1.56e-11	8.17e-09	-39.3089	0	0	1	-1925	NM_001271523	+	Lsp1
chr7	150598660	150598660	+	1.18e-09	2.52e-07	-39.032	0	0	1	48296	NM_001161624	-	Cdkn1c
chr1	194597417	194597417	+	9.57e-10	2.14e-07	-38.7784	1	0	0	-5	NM_144881	-	Hhat
chr4	34284990	34284990	+	7.19e-08	6.58e-06	-38.3422	0	0	0	-147949	NM_026293	-	Spaca1
chr18	10542053	10542053	+	1.76e-08	2.2e-06	-38.1432	0	1	0	68298	NM_001081222	-	Esco1
chr1	53574733	53574733	+	3.04e-11	1.33e-08	-38.1427	0	0	1	-165138	NM_001290984	-	Asnsd1
chr13	46012973	46012973	+	7.09e-10	1.65e-07	-37.9698	0	0	1	47388	NM_001199305	-	Atxn1
chr7	87515622	87515622	+	3.45e-10	9.33e-08	-37.8626	1	1	0	640	NM_172903	-	Man2a2
chr1	154803078	154803078	+	1.11e-16	6.82e-13	-37.5163	1	0	1	849	NM_175460	+	Nmnat2
chr6	121474559	121474559	+	1.64e-10	5.18e-08	-37.2118	0	0	0	-50864	NM_001289685	-	Iqsec3
chrX	149933212	149933212	+	6.68e-08	6.23e-06	-36.9446	1	1	0	439	NM_018798	+	Ubqln2
chr11	103201509	103201509	+	2.67e-08	3.06e-06	-36.8036	0	1	0	4508	NM_133715	-	Arhgap27
chr11	115449792	115449792	+	1.07e-11	6.11e-09	-36.7526	0	1	1	15439	NM_173048	-	Gga3
chr10	61158929	61158929	+	1.44e-08	1.87e-06	-36.4492	1	1	1	597	NR_073587	+	Tysnd1
chr4	152813593	152813593	+	8.35e-11	3.07e-08	-36.2229	0	0	1	43347	NM_001099299	-	Ajap1
chr15	89260062	89260062	+	3.58e-11	1.53e-08	-35.9413	1	1	0	297	NM_007692	-	Chkb
chr11	70029088	70029088	+	2.46e-14	3.72e-11	-35.8862	0	1	0	1678	NM_153081	+	Slc16a11
chr7	102970714	102970714	+	5.52e-09	8.69e-07	-35.8408	0	0	0	-388433	NM_011858	+	Tenm4
chr10	40924943	40924943	+	1.79e-09	3.51e-07	-35.832	0	0	1	98105	NM_133999	-	Fig4
chr11	117819913	117819913	+	7.54e-08	6.86e-06	-35.5466	0	0	0	10768	NM_007707	-	Socs3
chr9	75174506	75174506	+	4.76e-11	1.9e-08	-35.5348	0	0	1	12633	NR_073186	+	Gnb5
chr4	62021556	62021556	+	2.67e-10	7.63e-08	-35.4109	1	1	0	27	NM_001045528	-	Fkbp15
chrX	166428153	166428153	+	1.47e-11	7.8e-09	-35.2713	0	1	0	-11305	NR_029457	-	G530011O06Rik
chr2	80654097	80654097	+	2.47e-07	1.72e-05	-35.0344	0	0	0	174678	NM_001190179	+	Nup35
chr4	155144766	155144766	+	2.78e-08	3.17e-06	-34.8096	0	1	0	3905	NM_147776	-	Vwa1
chr3	87355174	87355174	+	5.14e-09	8.16e-07	-34.4522	0	0	0	25676	NM_001286844	+	Etv3
chr11	102263398	102263398	+	1.08e-08	1.47e-06	-34.3935	0	1	0	2904	NR_105895	-	Mir6930
chr2	75628438	75628438	+	2.2e-07	1.58e-05	-34.3552	0	0	0	-41796	NM_172666	+	Agps
chr19	12040280	12040280	+	9.24e-12	5.49e-09	-34.3137	1	0	0	-54	NM_001033174	+	Osbp
chr2	63975933	63975933	+	1.7e-05	0.000449235	-34.3103	0	0	0	-39839	NM_021716	-	Fign
chr7	31741845	31741845	+	9.77e-08	8.33e-06	-34.3013	1	0	0	-24	NM_011680	-	Usf2
chr7	25718878	25718878	+	2.62e-08	3.02e-06	-34.1674	0	0	0	29515	NM_001130152	+	Arhgef1
chrX	91367646	91367646	+	1.53e-08	1.98e-06	-34.0778	0	0	1	1101	NM_011768	-	Zfx
chrX	138740315	138740315	+	1.34e-07	1.07e-05	-34.0519	1	1	0	427	NM_021487	-	Kcne1l
chr2	131248727	131248727	+	1.32e-07	1.06e-05	-33.9947	0	0	0	-68871	NM_001177839	+	Smox
chr8	123779954	123779954	+	3.62e-07	2.31e-05	-33.8557	0	0	0	128371	NM_008024	+	Foxl1
chr4	107890536	107890536	+	3.44e-13	3.64e-10	-33.8521	1	0	0	-10	NM_001167936	-	Zyg11a
chr11	105805249	105805249	+	1.42e-05	0.000392603	-33.7807	1	0	1	213	NM_007805	-	Cyb561
chr5	24728772	24728772	+	1.21e-07	9.86e-06	-33.7562	1	1	0	63	NM_144908	+	Galnt11
chr15	101987455	101987455	+	3.03e-08	3.35e-06	-33.7277	0	1	0	6451	NM_146064	+	Soat2
chr12	86012591	86012591	+	2.58e-10	7.44e-08	-33.652	0	0	0	27167	NM_001033334	-	Syndig1l
chr5	97516252	97516252	+	1.37e-07	1.09e-05	-33.6375	0	1	1	24364	NM_198422	-	Paqr3
chr13	49320101	49320101	+	2.32e-09	4.33e-07	-33.5366	0	0	0	-8707	NM_026738	-	1110007C09Rik
chr9	48538384	48538384	+	3.22e-15	7.81e-12	-33.5352	0	0	1	105667	NM_001033324	-	Zbtb16
chr18	37114609	37114609	+	1.2e-09	2.56e-07	-33.4146	0	1	1	2268	NM_007766	+	Pcdha4
chr8	48618633	48618633	+	4.77e-09	7.77e-07	-33.1725	1	0	1	192	NM_177240	-	Trappc11
chr14	30871821	30871821	+	7.26e-05	0.00132827	-33.163	0	0	1	36004	NM_175343	+	Chdh
chr17	27085809	27085809	+	1.17e-05	0.000339117	-33.1223	1	0	1	-746	NR_037244	-	Mir3083
chr1	95178263	95178263	+	4.02e-07	2.5e-05	-33.0991	0	1	0	7139	NR_105866	+	Mir6901
chr5	73726071	73726071	+	2.01e-08	2.44e-06	-33.0428	0	0	1	3808	NM_026950	-	Ociad2
chr15	78058419	78058419	+	7.06e-10	1.65e-07	-32.8973	0	0	0	-16822	NM_008677	+	Ncf4
chr9	53055700	53055700	+	3.68e-06	0.000138253	-32.8219	1	0	1	518	NM_029936	-	Ddx10
chr17	25150807	25150807	+	7.34e-07	3.95e-05	-32.7986	0	1	0	1369	NM_020608	-	Cramp1l
chr4	126699718	126699718	+	8.31e-09	1.21e-06	-32.7586	0	0	1	1175	NR_045010	+	Sfpq
chr9	108208341	108208341	+	9.8e-09	1.37e-06	-32.7533	1	0	0	-60	NM_133986	-	Tcta
chr7	19955765	19955765	+	4.64e-10	1.16e-07	-32.7257	0	1	0	9202	NM_001010836	+	Ppp1r13l
chr16	11984835	11984835	+	1.07e-09	2.34e-07	-32.7023	1	1	0	631	NM_028277	+	Shisa9
chr13	38085642	38085642	+	1.36e-09	2.84e-07	-32.6826	1	0	1	418	NM_025965	-	Ssr1
chr11	59120042	59120042	+	1.33e-15	4.23e-12	-32.6459	1	0	0	-390	NM_139298	+	Wnt9a
chr13	65360458	65360458	+	1.28e-08	1.7e-06	-32.6109	0	0	0	-19704	NM_178364	+	Zfp369
chr11	74111884	74111884	+	1.09e-11	6.14e-09	-32.5407	0	0	0	14575	NM_011002	+	Olfr59
chr1	120852037	120852037	+	2.4e-06	9.83e-05	-32.4758	0	0	1	98160	NM_001081125	-	Gli2
chr5	124567025	124567025	+	4.48e-07	2.74e-05	-32.4047	1	1	0	910	NM_144509	+	Arl6ip4
chr14	64561075	64561075	+	9.34e-07	4.79e-05	-32.336	0	0	0	-1468	NM_011446	+	Sox7
chr11	119059725	119059725	+	7.45e-09	1.11e-06	-32.3308	0	0	1	30089	NM_172443	-	Tbc1d16
chr16	36056551	36056551	+	4.8e-05	0.000981104	-32.3234	0	0	1	15051	NM_027342	-	Fam162a
chr2	19367204	19367204	+	5.83e-07	3.34e-05	-32.3038	1	0	0	-86	NM_018809	+	Ptf1a
chr15	83935994	83935994	+	7.47e-07	4.01e-05	-32.2954	1	1	0	191	NM_013873	-	Sult4a1
chr15	88898764	88898764	+	1.42e-09	2.9e-07	-32.2256	0	1	0	7521	NR_040417	-	1810021B22Rik
chr9	110147308	110147308	+	6.4e-10	1.51e-07	-32.145	0	1	0	1023	NM_001166273	+	Cspg5
chr8	72406649	72406649	+	2.97e-11	1.31e-08	-32.0924	0	1	0	4643	NM_026818	-	Cilp2
chr1	74962361	74962361	+	9.42e-09	1.33e-06	-32.0346	0	0	1	-15067	NR_029876	-	Mir375
chr12	78953758	78953758	+	2.32e-10	6.82e-08	-32.0327	0	0	0	-373884	NM_172952	+	Gphn
chr8	74204444	74204444	+	2.74e-09	4.94e-07	-32.0286	0	1	0	4164	NM_001190830	+	Jak3
chr3	94944340	94944340	+	8.25e-06	0.000257865	-31.9829	0	1	0	-1233	NR_106175	-	Mir8099-1
chr2	148233062	148233062	+	3.65e-05	0.000795817	-31.7882	1	1	0	863	NM_009378	-	Thbd
chr9	21657074	21657074	+	5.05e-08	5.01e-06	-31.6971	1	1	0	6	NM_177030	-	Dock6
chr2	59184525	59184525	+	8.61e-09	1.24e-06	-31.6692	0	0	1	40215	NR_040510	-	5330411J11Rik
chr5	141676498	141676498	+	1.21e-07	9.86e-06	-31.4416	0	0	0	-40990	NM_177879	+	Sdk1
chr17	47547239	47547239	+	1.78e-09	3.49e-07	-31.4324	0	0	0	4422	NM_001172091	-	1700001C19Rik
chr2	25562298	25562298	+	3.11e-08	3.43e-06	-31.4099	1	0	0	-101	NM_023326	+	Bmyc
chr12	73171594	73171594	+	1.08e-09	2.36e-07	-31.3725	1	1	0	385	NM_181752	-	Gpr135
chr5	124626758	124626758	+	3.18e-05	0.000715646	-31.3725	0	0	1	10434	NM_001289472	-	Pitpnm2
chr4	153974030	153974030	+	8.77e-08	7.71e-06	-31.3682	0	0	1	36447	NR_045643	-	5930403L14Rik
chr5	89316103	89316103	+	6.18e-07	3.49e-05	-31.3253	1	0	0	-182	NM_018760	+	Slc4a4
chr3	107864527	107864527	+	2.27e-07	1.63e-05	-31.3148	0	0	0	-16751	NM_001160411	-	Gstm4
chr1	55144433	55144433	+	1.62e-05	0.000433388	-31.2203	1	0	1	344	NM_010477	-	Hspd1
chr4	107890539	107890539	+	5.27e-10	1.28e-07	-31.1855	1	0	0	-13	NM_001167936	-	Zyg11a
chr11	84633024	84633024	+	2.05e-07	1.49e-05	-31.1571	1	0	0	-8	NM_145433	-	Mrm1
chr15	84276681	84276681	+	2.73e-08	3.11e-06	-31.1559	1	0	1	847	NM_001163145	-	1810041L15Rik
chr6	110595991	110595991	+	5.83e-09	9.12e-07	-31.0883	1	1	0	401	NM_177328	+	Grm7
chr2	26062163	26062163	+	3.61e-07	2.3e-05	-31.088	1	0	1	-69	NM_001039653	-	Lhx3
chrX	91367637	91367637	+	5.35e-07	3.13e-05	-31.0445	0	0	1	1110	NM_011768	-	Zfx
chr4	126989839	126989839	+	2e-14	3.47e-11	-31.0307	0	1	0	1445	NM_008120	-	Gja4
chr10	114821486	114821486	+	6.41e-08	6.06e-06	-31.0238	1	1	0	6	NM_025780	-	Thap2
chr7	133943068	133943068	+	5.08e-07	3.01e-05	-30.973	1	0	1	-301	NM_007438	-	Aldoa
chr12	103367281	103367281	+	1.03e-05	0.000306671	-30.8996	1	0	0	-348	NM_172152	+	Slc24a4
chr5	144742032	144742032	+	5.85e-08	5.63e-06	-30.8622	0	0	0	33691	NM_177682	-	Ccz1
chr11	113518154	113518154	+	1.24e-06	5.96e-05	-30.8564	0	0	1	7313	NM_013581	+	Cog1
chr5	30890807	30890807	+	1.55e-09	3.11e-07	-30.8194	1	1	0	186	NR_040427	-	Gm9899
chr11	68902035	68902035	+	6.44e-07	3.58e-05	-30.7994	1	1	0	7	NM_009497	+	Vamp2
chr13	23401481	23401481	+	1.13e-08	1.53e-06	-30.7979	0	0	1	3796	NR_126444	-	4930557F10Rik
chr8	3336958	3336958	+	4.22e-09	7.04e-07	-30.7932	0	0	0	-16457	NM_001033378	+	A430078G23Rik
chrX	155463194	155463194	+	2.31e-14	3.61e-11	-30.7397	0	0	0	-230520	NM_148945	+	Rps6ka3
chr17	27596913	27596913	+	6.56e-05	0.00122916	-30.7173	0	0	1	43566	NM_001013385	-	Grm4
chr1	52289495	52289495	+	1.96e-12	1.6e-09	-30.7032	1	1	0	582	NM_001113383	-	Gls
chr7	87516051	87516051	+	3.59e-08	3.84e-06	-30.7016	1	1	0	211	NM_172903	-	Man2a2
chr4	129816269	129816269	+	1.74e-06	7.72e-05	-30.6922	1	1	0	138	NM_198959	-	Hcrtr1
chr2	168645440	168645440	+	1.9e-07	1.41e-05	-30.6841	0	0	0	-52740	NM_175303	-	Sall4
chr11	94425852	94425852	+	1.38e-09	2.86e-07	-30.6839	1	0	1	-536	NM_007689	+	Chad
chr7	150598675	150598675	+	1.19e-05	0.000342524	-30.6418	0	0	1	48281	NM_001161624	-	Cdkn1c
chr10	81043347	81043347	+	3.7e-08	3.94e-06	-30.4278	0	1	0	5317	NM_001252401	+	Tle2
chrX	49034482	49034482	+	3.85e-07	2.42e-05	-30.3985	1	1	0	298	NM_001077202	-	Hs6st2
chr4	155504804	155504804	+	1.16e-08	1.56e-06	-30.396	0	0	0	-1475	NM_001220499	+	Rnf223
chrX	12250684	12250684	+	2.1e-13	2.33e-10	-30.3718	1	0	0	-13	NM_175141	-	1810030O07Rik
chr6	101394551	101394551	+	5.27e-10	1.28e-07	-30.3545	0	0	0	-66661	NM_018884	-	Pdzrn3
chr5	138721287	138721287	+	1.8e-09	3.52e-07	-30.2679	1	0	0	-123	NM_172412	-	Gpc2
chr17	25520062	25520062	+	1.6e-10	5.11e-08	-30.2569	0	1	0	12566	NM_012034	+	Tpsg1
chr11	84336517	84336517	+	1.57e-06	7.18e-05	-30.2391	0	0	1	2520	NM_008498	-	Lhx1
chrX	162676768	162676768	+	5.74e-07	3.31e-05	-30.2146	1	0	0	-107	NM_001177962	+	Gpm6b
chr8	4210798	4210798	+	1.51e-12	1.31e-09	-30.1851	0	1	0	6515	NM_207203	-	Prr36
chr13	108390896	108390896	+	1.36e-12	1.2e-09	-30.1526	0	0	0	-86581	NR_045900	+	1700006H21Rik
chr1	184694356	184694356	+	6.93e-10	1.63e-07	-30.1478	1	0	0	-681	NM_144796	+	Susd4
chr2	73115252	73115252	+	8.01e-08	7.19e-06	-30.1461	0	0	0	5271	NM_001005343	+	Sp9
chr7	112574359	112574359	+	2.2e-05	0.000542894	-30.1343	1	1	0	27	NM_007627	+	Cckbr
chr7	56215674	56215674	+	1.69e-06	7.56e-05	-30.1304	0	0	1	1233	NM_001111016	+	Nav2
chr17	47766885	47766885	+	1.55e-07	1.2e-05	-30.1204	1	0	0	-754	NM_198421	+	Usp49
chr15	99804002	99804002	+	2.98e-12	2.15e-09	-30.0955	1	0	1	-285	NR_028124	-	2310068J16Rik
chr15	67007518	67007518	+	5.86e-06	0.000199185	-30.076	1	0	1	927	NM_009177	-	St3gal1
chr4	130501761	130501761	+	0	0	-30.0734	0	1	0	1463	NM_010769	+	Matn1
chr4	24893190	24893190	+	4.49e-08	4.56e-06	-30.07	0	0	0	-7376	NM_030733	+	Gpr63
chr7	106001972	106001972	+	4.87e-07	2.91e-05	-29.9824	0	1	0	14619	NM_001285795	+	Wnt11
chr8	73311636	73311636	+	6.16e-09	9.49e-07	-29.9814	0	1	0	4697	NM_199308	-	Mast3
chrX	132706037	132706037	+	2.15e-10	6.45e-08	-29.9663	1	1	1	754	NM_001168578	-	Tceal8
chr7	4103222	4103222	+	5.01e-06	0.000175816	-29.9512	0	1	0	-1749	NM_175529	-	Leng9
chr7	49777503	49777503	+	8.74e-07	4.55e-05	-29.9467	0	0	0	-74054	NM_027702	-	4933421I07Rik
chr17	47052779	47052779	+	9.17e-10	2.06e-07	-29.9325	0	0	1	5347	NM_008938	+	Prph2
chr4	150503877	150503877	+	6e-11	2.32e-08	-29.931	0	0	1	-71816	NM_009498	-	Vamp3
chr17	29628990	29628990	+	6.27e-09	9.6e-07	-29.8909	0	0	1	1002	NM_008842	+	Pim1
chr1	16508991	16508991	+	1.18e-08	1.59e-06	-29.8246	1	0	1	393	NM_025303	-	Stau2
chr5	125029113	125029113	+	8.33e-15	1.74e-11	-29.7521	1	0	0	-44	NM_181410	+	Gtf2h3
chr1	11699601	11699601	+	4.03e-12	2.75e-09	-29.7389	0	0	1	295417	NM_001160370	+	A830018L16Rik
chr6	134517074	134517074	+	2.95e-07	1.96e-05	-29.6703	1	0	0	-144	NM_008514	-	Lrp6
chr14	118532073	118532073	+	1.11e-10	3.78e-08	-29.6596	1	0	0	-87	NM_029578	-	Tgds
chr17	25520057	25520057	+	7.14e-08	6.56e-06	-29.6552	0	1	0	12561	NM_012034	+	Tpsg1
chrX	7309850	7309850	+	1.53e-05	0.000413082	-29.5922	0	1	0	4155	NM_138602	+	Praf2
chr7	77482503	77482503	+	1.34e-07	1.07e-05	-29.5908	0	0	0	22977	NM_009697	-	Nr2f2
chr7	5004956	5004956	+	4.1e-05	0.000872068	-29.5775	0	1	0	1824	NM_026900	+	Zfp580
chr4	55542938	55542938	+	4.56e-06	0.000163245	-29.5605	0	1	0	2410	NM_010637	-	Klf4
chr12	20318392	20318392	+	8.84e-05	0.00153014	-29.4895	0	0	0	503249	NR_015521	-	1700030C10Rik
chr12	24485880	24485880	+	4.4e-10	1.12e-07	-29.4574	0	0	0	296255	NM_001256489	-	9030624G23Rik
chr9	120079525	120079525	+	2.35e-09	4.35e-07	-29.4032	0	0	1	20667	NM_001039364	+	Mobp
chr14	27399259	27399259	+	4.39e-07	2.69e-05	-29.37	1	1	1	225	NM_145969	+	Dennd6a
chr3	107990338	107990338	+	2.72e-08	3.1e-06	-29.3677	0	1	0	1133	NM_146137	+	Amigo1
chr1	23389546	23389546	+	2.81e-07	1.9e-05	-29.3392	1	0	1	469	NM_001081079	-	Ogfrl1
chr5	93238240	93238240	+	1.16e-07	9.48e-06	-29.3119	1	0	1	-168	NM_001077595	+	Shroom3
chr1	154803312	154803312	+	7.57e-14	9.43e-11	-29.3035	0	0	1	1083	NM_175460	+	Nmnat2
chr18	60939091	60939091	+	1.58e-07	1.22e-05	-29.2788	0	0	0	4843	NM_020600	+	Rps14
chr2	148233080	148233080	+	1.49e-07	1.16e-05	-29.2498	1	1	0	845	NM_009378	-	Thbd
chr13	3625977	3625977	+	1.13e-08	1.53e-06	-29.1978	0	0	0	-7301	NM_178283	+	Asb13
chr19	5107980	5107980	+	4.09e-10	1.06e-07	-29.1826	1	1	0	-985	NM_029576	-	Rab1b
chr3	90193486	90193486	+	3.29e-05	0.000737222	-29.1447	1	1	0	364	NM_011988	-	Slc27a3
chr5	138704772	138704772	+	4.41e-05	0.000920191	-29.1342	1	1	0	-501	NR_045821	+	6330418K02Rik
chr2	174124856	174124856	+	1.69e-10	5.31e-08	-29.0451	0	1	1	1498	NM_201618	+	Gnas
chr9	59503922	59503922	+	0.00046707	0.00516694	-29.0348	1	0	0	-253	NM_001253883	+	Pkm
chr2	163145392	163145392	+	1.09e-07	8.99e-06	-29.0326	0	0	1	78318	NM_021566	-	Jph2
chr5	115722291	115722291	+	1.79e-05	0.000467358	-29.0137	1	1	0	614	NM_016698	-	Rnf10
chr5	144014872	144014872	+	0.000163851	0.0024147	-29.0043	0	1	0	16830	NM_017467	-	Zfp316
chr2	4313121	4313121	+	1.11e-06	5.51e-05	-28.9683	0	0	1	-8901	NM_001177843	+	Frmd4a
chr8	9158840	9158840	+	2.12e-05	0.000528296	-28.9546	0	0	0	14173	NR_073360	+	4930453L07Rik
chr11	4192056	4192056	+	1.99e-07	1.46e-05	-28.9455	0	0	0	25259	NM_001039537	+	Lif
chr4	154515238	154515238	+	5.01e-06	0.000175816	-28.9122	0	0	1	54554	NM_001081100	+	Morn1
chr3	94828993	94828993	+	9.09e-07	4.7e-05	-28.8853	0	0	0	-9834	NM_030074	-	Zfp687
chr2	150834756	150834756	+	2.19e-06	9.16e-05	-28.8617	1	0	1	379	NM_207204	-	Ninl
chr5	144014905	144014905	+	0.00011257	0.0018348	-28.8456	0	1	0	16797	NM_017467	-	Zfp316
chrX	166428147	166428147	+	3.92e-08	4.1e-06	-28.8372	0	1	0	-11299	NR_029457	-	G530011O06Rik
chr8	86726562	86726562	+	3.01e-10	8.36e-08	-28.7883	0	0	0	-5855	NR_029740	+	Mir23a
chr8	127736702	127736702	+	2.1e-08	2.52e-06	-28.7854	0	0	1	158609	NM_174854	+	Disc1
chr17	25520065	25520065	+	9.05e-10	2.03e-07	-28.7532	0	1	0	12569	NM_012034	+	Tpsg1
chr11	102300014	102300014	+	4.39e-07	2.69e-05	-28.7307	0	1	0	8380	NM_008175	+	Grn
chr2	61650371	61650371	+	9.94e-08	8.42e-06	-28.6989	0	1	0	7863	NM_009322	+	Tbr1
chr13	9819009	9819009	+	2.41e-09	4.43e-07	-28.674	0	0	0	-54450	NM_144516	-	Zmynd11
chrX	78316684	78316684	+	7.5e-07	4.03e-05	-28.6588	1	0	1	703	NM_138751	+	Tmem47
chr1	122228947	122228947	+	7.73e-07	4.12e-05	-28.6293	0	0	0	-8212	NM_207233	+	C1ql2
chr14	27681019	27681019	+	6.5e-05	0.0012205	-28.6195	0	0	0	-26771	NM_001170748	+	Asb14
chr8	108535132	108535132	+	1.96e-09	3.78e-07	-28.5714	1	1	0	-246	NM_025518	+	Dus2
chr9	20472592	20472592	+	2.7e-12	2.01e-09	-28.526	0	1	0	16020	NM_023371	+	Pin1
chr10	48728232	48728232	+	4.89e-08	4.87e-06	-28.4212	0	0	0	87418	NR_046212	-	C130030K03Rik
chr2	166612391	166612391	+	8.72e-05	0.00151381	-28.4126	0	0	0	-6876	NM_023815	+	Trp53rkb
chr12	73171597	73171597	+	2.89e-08	3.23e-06	-28.3952	1	1	0	382	NM_181752	-	Gpr135
chr4	14772873	14772873	+	8.04e-10	1.83e-07	-28.3628	0	0	0	-18493	NM_028264	+	Tmem55a
chr9	20677402	20677402	+	1.46e-05	0.000401046	-28.3385	0	1	0	4318	NM_175687	+	A230050P20Rik
chr8	89996842	89996842	+	6.76e-13	6.49e-10	-28.3315	1	1	0	133	NR_033430	+	Gm2694
chr15	98828524	98828524	+	4.46e-07	2.73e-05	-28.3265	0	0	0	12130	NR_045991	+	4930578M01Rik
chr13	55009246	55009246	+	6.47e-06	0.000214907	-28.3167	0	0	0	-41547	NM_153131	+	Unc5a
chrX	22941793	22941793	+	6.67e-06	0.000220062	-28.2741	1	0	1	416	NM_026167	-	Klhl13
chr5	113452500	113452500	+	1.18e-06	5.75e-05	-28.2637	0	0	0	-7943	NM_001285806	-	Adrbk2
chr16	90498452	90498452	+	1.79e-07	1.35e-05	-28.2589	0	1	0	111812	NM_015755	+	Hunk
chr15	100753627	100753627	+	1.79e-05	0.000465802	-28.2491	0	0	1	-13075	NM_011323	+	Scn8a
chr7	129211319	129211319	+	1.81e-07	1.35e-05	-28.2322	1	1	0	609	NM_138589	+	Ubfd1
chr6	137201400	137201400	+	1.17e-05	0.000337178	-28.2268	1	0	1	582	NM_001164401	+	Ptpro
chr18	56838309	56838309	+	5.31e-06	0.0001844	-28.2163	0	0	0	-29158	NM_010721	+	Lmnb1
chr8	113018401	113018401	+	3.99e-05	0.000853979	-28.1095	0	0	1	7856	NR_105058	-	Gm21283
chr9	77383026	77383026	+	5.63e-08	5.48e-06	-28.0961	0	0	1	8841	NM_172528	-	Lrrc1
chr8	107901352	107901352	+	7.46e-12	4.64e-09	-28.0754	0	0	1	2073	NM_001081333	+	Plekhg4
chr8	10854210	10854210	+	0	0	-28.0576	0	0	0	28245	NR_040705	-	B930025P03Rik
chr5	118094483	118094483	+	4.77e-14	6.47e-11	-28.0506	0	0	1	-222645	NM_008712	+	Nos1
chr8	11312722	11312722	+	5.37e-08	5.27e-06	-28.0471	1	1	0	105	NM_009931	-	Col4a1
chr4	125826636	125826636	+	7.36e-12	4.61e-09	-28.0261	0	1	0	1391	NM_172145	+	Eva1b
chr2	168057056	168057056	+	2.69e-07	1.84e-05	-28.026	1	1	0	936	NM_001160330	+	Mocs3
chr11	100534636	100534636	+	8.43e-07	4.41e-05	-28.0103	0	0	0	-22630	NM_177790	-	Zfp385c
chr2	13082467	13082467	+	1.17e-08	1.57e-06	-27.9925	0	0	1	110576	NM_009105	-	Rsu1
chr5	138635889	138635889	+	5.86e-07	3.35e-05	-27.9615	1	1	0	349	NM_177878	+	Mblac1
chr9	44314665	44314665	+	1.16e-09	2.5e-07	-27.9552	0	1	0	7448	NM_030256	+	Bcl9l
chr19	47585090	47585090	+	1.25e-05	0.000354004	-27.947	0	0	1	-2382	NR_045322	+	Gm19557
chr14	34141732	34141732	+	6.63e-07	3.67e-05	-27.9422	0	0	1	111725	NM_153800	+	Arhgap22
chr19	44014231	44014231	+	5.53e-05	0.00108341	-27.9352	1	0	1	458	NM_028029	-	Dnmbp
chr8	122754123	122754123	+	4.18e-05	0.000884264	-27.9294	0	0	0	-1994	NR_110496	-	A330074K22Rik
chr5	113131074	113131074	+	5.89e-06	0.000199948	-27.9173	0	0	1	-91238	NR_040676	+	1700095B10Rik
chr12	103929642	103929642	+	2.33e-05	0.000567005	-27.8847	0	0	1	-6413	NR_035457	-	Mir1936
chr12	118391018	118391018	+	0.000112251	0.0018309	-27.8694	0	0	1	-1277	NR_033538	-	Gm10421
chr12	70231249	70231249	+	4.85e-05	0.000987201	-27.8669	0	0	0	28925	NM_009093	-	Rps29
chr13	55589878	55589878	+	4.22e-11	1.72e-08	-27.8635	1	0	0	-442	NM_001177371	-	Dbn1
chr13	66908804	66908804	+	3.52e-05	0.000773941	-27.8554	0	0	0	97483	NM_026219	-	Uqcrb
chr10	60278423	60278423	+	4.73e-06	0.000167837	-27.8545	0	0	1	15907	NM_029770	-	Unc5b
chr14	66295309	66295309	+	3.31e-05	0.000740651	-27.847	0	0	1	10071	NM_001168318	+	Scara5
chr15	88693221	88693221	+	1.07e-07	8.93e-06	-27.836	1	0	1	599	NM_145478	+	Pim3
chrX	138740304	138740304	+	0.000116519	0.00187593	-27.8255	1	1	0	438	NM_021487	-	Kcne1l
chr3	107990333	107990333	+	2.43e-07	1.7e-05	-27.823	0	1	0	1128	NM_146137	+	Amigo1
chr12	109154938	109154938	+	1.23e-10	4.14e-08	-27.8173	0	1	0	86687	NM_001286343	-	Bcl11b
chr5	120885490	120885490	+	1.38e-06	6.48e-05	-27.8165	0	1	0	3597	NM_008499	+	Lhx5
chr11	115449806	115449806	+	6.11e-06	0.000205829	-27.7738	0	1	1	15425	NM_173048	-	Gga3
chr2	173365248	173365248	+	8.38e-08	7.46e-06	-27.7678	0	0	0	17157	NM_028158	+	1700021F07Rik
chr4	152856986	152856986	+	7.3e-10	1.68e-07	-27.7526	1	0	0	-48	NM_001099299	-	Ajap1
chr18	75502971	75502971	+	6e-06	0.000202944	-27.7513	0	0	0	-24048	NM_001042660	+	Smad7
chr2	71404791	71404791	+	2.01e-10	6.08e-08	-27.6768	0	0	0	-19981	NM_010054	-	Dlx2
chr11	102662270	102662270	+	1.25e-07	1.01e-05	-27.673	0	1	0	4064	NM_008122	-	Gjc1
chr7	31837393	31837393	+	1.04e-05	0.000308881	-27.6301	1	0	1	-921	NM_022007	-	Fxyd7
chr1	137440184	137440184	+	2.17e-05	0.000537756	-27.6273	0	0	1	41749	NM_173437	-	Nav1
chr17	25520092	25520092	+	2.19e-06	9.16e-05	-27.6187	0	1	0	12596	NM_012034	+	Tpsg1
chr4	145230901	145230901	+	1.38e-06	6.48e-05	-27.6153	0	0	0	23854	NM_001205101	+	Gm13212
chr7	52139986	52139986	+	9.86e-09	1.38e-06	-27.6136	0	1	0	7751	NM_029365	-	Med25
chr8	98157290	98157290	+	7.3e-05	0.00133407	-27.6096	1	0	0	-169	NM_030198	+	Gins3
chr1	163061705	163061705	+	1.02e-11	5.82e-09	-27.6032	1	0	0	-96	NM_001039482	-	Klhl20
chrX	7234274	7234274	+	5.05e-07	2.99e-05	-27.5862	1	0	0	-231	NM_001290624	+	Prickle3
chr19	37308492	37308492	+	1.09e-06	5.42e-05	-27.5851	0	0	0	26459	NM_027314	+	2016-03-05
chr5	111848973	111848973	+	2.21e-06	9.21e-05	-27.5492	0	1	0	1789	NM_001081235	+	Mn1
chr7	21965876	21965876	+	1.45e-10	4.7e-08	-27.5458	0	0	0	18674	NM_001166707	+	Vmn1r123
chr1	138157023	138157023	+	3.04e-11	1.33e-08	-27.5444	1	1	0	428	NM_001101516	-	Gpr25
chr12	58646575	58646575	+	2.23e-05	0.000548954	-27.5184	1	0	1	534	NM_008259	-	Foxa1
chr17	46787460	46787460	+	8.68e-08	7.66e-06	-27.5078	1	1	0	175	NM_025611	+	Cul7
chr10	120046940	120046940	+	5.33e-06	0.000185068	-27.4979	0	0	0	-132950	NM_010441	-	Hmga2
chr2	152052893	152052893	+	5.16e-08	5.11e-06	-27.4771	1	0	1	319	NM_007788	+	Csnk2a1
chr2	173936547	173936547	+	1.32e-06	6.24e-05	-27.4707	1	0	1	697	NM_213733	+	Npepl1
chr5	138612379	138612379	+	2.34e-05	0.000568467	-27.4552	1	0	1	712	NM_008568	-	Mcm7
chr12	20318399	20318399	+	0.000168335	0.00245766	-27.3891	0	0	0	503242	NR_015521	-	1700030C10Rik
chr10	110996448	110996448	+	6.61e-05	0.00123651	-27.3646	0	0	0	34882	NR_045344	-	4933440J02Rik
chrX	80078746	80078746	+	0.000269026	0.00346732	-27.3592	0	0	0	-115463	NM_007868	+	Dmd
chr9	58006060	58006060	+	2.41e-07	1.69e-05	-27.3339	1	0	1	302	NM_001195431	-	Islr
chr19	3912754	3912754	+	6.11e-14	7.81e-11	-27.3256	1	1	0	21	NM_001271444	-	Ndufs8
chr5	73726068	73726068	+	5.34e-05	0.00105601	-27.3175	0	0	1	3811	NM_026950	-	Ociad2
chr2	119999843	119999843	+	6.71e-07	3.7e-05	-27.3172	0	0	1	-19533	NM_133838	-	Ehd4
chr13	21271933	21271933	+	5.88e-11	2.29e-08	-27.2936	1	1	0	135	NM_009054	+	Trim27
chr1	132943481	132943481	+	3.37e-07	2.19e-05	-27.2853	0	0	0	27061	NM_010548	+	Il10
chr1	186952443	186952443	+	6.13e-07	3.46e-05	-27.2777	0	0	0	-75604	NM_001163754	+	Rab3gap2
chr8	123608418	123608418	+	1.02e-06	5.15e-05	-27.2358	1	1	0	134	NM_010426	+	Foxf1
chrX	33429037	33429037	+	2.35e-07	1.67e-05	-27.2207	1	0	1	212	NM_001009947	+	Dock11
chr7	133392403	133392403	+	2.28e-05	0.000558094	-27.2062	0	0	0	-23730	NM_145587	+	Sbk1
chr8	87229526	87229526	+	1.74e-09	3.44e-07	-27.2043	0	1	0	4172	NM_008535	+	Lyl1
chr12	81075587	81075587	+	5.41e-05	0.00106581	-27.1611	0	0	0	138414	NM_007564	-	Zfp36l1
chrX	49034469	49034469	+	6.55e-07	3.64e-05	-27.1558	1	1	0	311	NM_001077202	-	Hs6st2
chr3	129255407	129255407	+	6.98e-05	0.00128861	-27.151	0	0	1	20105	NM_130450	+	Elovl6
chr17	86042405	86042405	+	1.85e-06	8.07e-05	-27.1314	0	0	0	22233	NM_011381	+	Six3
chr10	33739521	33739521	+	1.1e-09	2.38e-07	-27.1073	1	0	0	-100	NM_025614	-	Rwdd1
chr2	9970155	9970155	+	5.66e-05	0.00110298	-27.0648	1	1	0	82	NM_027748	-	Taf3
chrX	109008894	109008894	+	8.27e-06	0.000258116	-27.0548	0	0	0	-198207	NM_001080549	-	Hdx
chr13	38037470	38037470	+	3.42e-06	0.000130233	-27.0476	0	0	1	48590	NM_025965	-	Ssr1
chr17	43013614	43013614	+	7.6e-05	0.00137196	-27.034	1	0	0	-242	NM_009847	-	Cd2ap
chr17	56139952	56139952	+	1.35e-07	1.07e-05	-27.0124	0	1	0	5078	NR_102313	-	Stap2
chr11	101398083	101398083	+	1.22e-05	0.000349606	-26.988	0	0	1	15187	NM_009764	-	Brca1
chr11	88006879	88006879	+	4.47e-06	0.00016091	-26.9627	1	1	0	-729	NM_001291270	+	Mrps23
chr11	16951776	16951776	+	4.48e-06	0.00016091	-26.9598	1	0	0	-161	NM_029861	+	Cnrip1
chr17	13220797	13220797	+	1.81e-06	7.98e-05	-26.9231	0	0	0	20094	NM_013671	+	Sod2
chr9	15084034	15084034	+	9.92e-07	5.03e-05	-26.907	1	1	0	278	NM_144933	-	Med17
chr11	97223405	97223405	+	3.82e-05	0.000825878	-26.9012	1	0	0	-460	NM_138657	+	Socs7
chr4	150809404	150809404	+	7.23e-06	0.0002334	-26.8916	0	0	1	-377343	NM_009498	-	Vamp3
chr10	118890864	118890864	+	3.09e-06	0.000120359	-26.8876	1	0	0	-226	NM_001277293	+	Grip1
chr5	129213854	129213854	+	4.39e-05	0.000916923	-26.8803	0	0	0	-28267	NM_021311	+	Piwil1
chrX	54306849	54306849	+	0.000565117	0.0059699	-26.8571	1	1	0	104	NM_028242	+	Htatsf1
chr11	64334262	64334262	+	1.71e-11	8.64e-09	-26.8547	0	1	0	-84087	NR_028445	-	F930015N05Rik
chr4	133913289	133913289	+	9.52e-06	0.000289075	-26.8379	0	1	0	14330	NM_001039677	+	Slc30a2
chr2	164776185	164776185	+	3.41e-09	5.92e-07	-26.8281	0	0	1	2468	NM_013599	+	Mmp9
chrX	6356131	6356131	+	0.00051802	0.00559161	-26.8088	1	0	0	-301	NM_177914	+	Dgkk
chr12	110098600	110098600	+	0	0	-26.8041	0	1	1	9263	NM_001012310	+	Slc25a47
chr15	76158113	76158113	+	1.72e-07	1.3e-05	-26.7981	1	0	1	288	NM_175399	+	Exosc4
chr16	3505040	3505040	+	7.18e-07	3.89e-05	-26.7767	0	0	0	-87358	NM_146860	+	Olfr161
chr17	13220809	13220809	+	3.84e-07	2.42e-05	-26.7666	0	0	0	20106	NM_013671	+	Sod2
chrX	162676760	162676760	+	4.78e-06	0.000169094	-26.7321	1	0	0	-115	NM_001177962	+	Gpm6b
chr1	93209771	93209771	+	7.37e-05	0.00134233	-26.7102	0	0	1	-8881	NM_001033292	+	Espnl
chr7	129164778	129164778	+	2.27e-07	1.63e-05	-26.7095	1	0	0	-67	NM_028758	-	Gga2
chr9	64188790	64188790	+	1.35e-06	6.39e-05	-26.7046	1	0	1	-211	NM_001177784	-	Dis3l
chr8	18678067	18678067	+	3.37e-08	3.65e-06	-26.7023	0	0	1	63496	NM_007426	-	Angpt2
chr7	31514830	31514830	+	4.89e-07	2.92e-05	-26.6735	1	1	0	-278	NM_027215	-	Tmem147
chr9	8582479	8582479	+	6.76e-13	6.49e-10	-26.6716	0	0	1	38339	NM_001282087	+	Trpc6
chr5	139064412	139064412	+	1.25e-05	0.000355376	-26.6522	1	0	1	327	NM_183025	+	A430033K04Rik
chr11	33104316	33104316	+	1.63e-10	5.17e-08	-26.6284	1	0	0	-729	NM_019916	-	Tlx3
chr11	120231111	120231111	+	4.22e-05	0.000889291	-26.6081	0	1	0	8265	NM_172802	+	Fscn2
chr4	138286356	138286356	+	2.72e-06	0.000108778	-26.5903	0	0	1	5118	NM_008868	+	Pla2g2c
chr11	117644325	117644325	+	1.3e-07	1.05e-05	-26.5839	1	0	1	355	NM_001195088	+	Tmc8
chr6	61130374	61130374	+	7.34e-09	1.1e-06	-26.577	1	1	1	57	NM_183310	+	Ccser1
chr6	125258982	125258982	+	1.58e-06	7.19e-05	-26.562	0	0	1	4907	NM_010736	-	Ltbr
chr10	74106682	74106682	+	3.8e-06	0.000141055	-26.5578	0	1	1	-323294	NM_010311	+	Gnaz
chr6	120244628	120244628	+	2.17e-06	9.09e-05	-26.5576	1	0	0	-52	NM_198884	-	B4galnt3
chr19	23216062	23216062	+	3.97e-08	4.12e-06	-26.5323	1	1	0	348	NM_010638	+	Klf9
chr9	119853055	119853055	+	8.17e-06	0.00025632	-26.5314	0	1	0	6333	NM_028735	+	Ttc21a
chr7	19722327	19722327	+	3.84e-11	1.61e-08	-26.5265	0	1	0	12219	NM_026111	-	Qpctl
chr2	25471864	25471864	+	6.25e-09	9.58e-07	-26.4957	0	0	1	1335	NM_029859	-	Ccdc183
chr2	29643075	29643075	+	8.15e-07	4.29e-05	-26.4931	1	1	0	117	NM_145520	-	Trub2
chr1	136883913	136883913	+	2.11e-06	8.91e-05	-26.45	0	1	0	24773	NM_001278115	+	Ube2t
chr7	53088496	53088496	+	1.78e-08	2.23e-06	-26.4399	0	1	0	-2338	NM_153419	-	Grwd1
chr4	117599326	117599326	+	4.61e-07	2.8e-05	-26.4287	0	1	0	3043	NM_001284191	-	Artn
chr5	146591698	146591698	+	1.63e-12	1.38e-09	-26.4097	0	0	1	25753	NM_177380	-	Cyp3a44
chr5	30890801	30890801	+	7.89e-08	7.11e-06	-26.3739	1	1	0	192	NR_040427	-	Gm9899
chr17	15673619	15673619	+	2.39e-08	2.81e-06	-26.3325	0	0	0	-9355	NM_008799	-	Pdcd2
chr2	26171183	26171183	+	1.37e-07	1.09e-05	-26.3318	1	1	0	132	NM_153410	+	Gpsm1
chr16	38363208	38363208	+	5.19e-05	0.00103727	-26.3309	1	1	0	914	NM_022318	+	Popdc2
chr9	77961432	77961432	+	2.52e-05	0.000601072	-26.3182	1	0	1	389	NM_019987	+	Ick
chr16	35581478	35581478	+	1.15e-09	2.49e-07	-26.3087	0	0	1	40032	NM_013661	+	Sema5b
chr5	110530153	110530153	+	3.39e-05	0.000752774	-26.3082	1	0	1	577	NM_001281812	+	Plcxd1
chr11	85700104	85700104	+	5.73e-06	0.000195628	-26.3025	0	0	0	-3461	NM_011536	+	Tbx4
chr4	154358146	154358146	+	2.14e-05	0.000532306	-26.3001	0	1	0	19906	NM_172990	+	Pank4
chr12	105923471	105923471	+	7.05e-06	0.000229233	-26.2941	0	0	0	66692	NM_148948	-	Dicer1
chr13	23831014	23831014	+	0.000115164	0.00186389	-26.2656	1	1	0	340	NM_015786	+	Hist1h1c
chr5	135517963	135517963	+	2.21e-10	6.57e-08	-26.2626	0	0	1	18523	NM_016801	+	Stx1a
chr18	46477014	46477014	+	3.21e-05	0.000720933	-26.2547	0	0	0	-5433	NM_001160399	-	Ccdc112
chr17	32325810	32325810	+	2.11e-11	1.01e-08	-26.252	1	1	0	599	NM_001033163	-	Ephx3
chr7	35355461	35355461	+	2.71e-07	1.85e-05	-26.2395	0	0	0	82400	NM_146188	-	Kctd15
chrX	138740321	138740321	+	0.000279868	0.00355975	-26.2357	1	1	0	421	NM_021487	-	Kcne1l
chr13	48674090	48674090	+	2.29e-07	1.63e-05	-26.2315	0	1	0	-40450	NR_029725	-	Mirlet7a-1
chr11	88726224	88726224	+	1.6e-05	0.000427733	-26.2244	1	0	1	-325	NM_001042541	-	Akap1
chr3	107389231	107389231	+	8.93e-06	0.000274485	-26.2129	0	0	0	-8718	NM_007441	+	Alx3
chr13	81772220	81772220	+	4.67e-11	1.87e-08	-26.2125	1	0	0	-78	NM_054053	-	Adgrv1
chr13	101603267	101603267	+	4.83e-09	7.83e-07	-26.2123	1	1	0	116	NM_022885	-	Slc30a5
chr10	77471804	77471804	+	4.75e-06	0.000168343	-26.1988	1	0	1	738	NM_008826	-	Pfkl
chr16	18588964	18588964	+	1.48e-05	0.000403632	-26.1672	0	0	1	1801	NM_001285472	-	Tbx1
chr11	100275478	100275478	+	7.08e-10	1.65e-07	-26.1598	1	0	1	656	NM_176830	-	P3h4
chr4	48863307	48863307	+	3.37e-06	0.000128561	-26.1248	0	0	0	186923	NM_026509	+	Murc
chr18	83532614	83532614	+	3.91e-06	0.000144288	-26.1206	0	0	0	-37339	NR_045361	-	4921531P14Rik
chr16	17452685	17452685	+	5.95e-07	3.39e-05	-26.1159	1	1	0	609	NM_001277231	+	Crkl
chr5	114739292	114739292	+	7.37e-06	0.000237017	-26.0801	0	0	0	-15523	NM_148935	-	Foxn4
chr14	8766916	8766916	+	1.62e-05	0.000433362	-26.0789	0	0	1	59781	NM_007870	-	Dnase1l3
chr11	47803145	47803145	+	8.09e-06	0.000254691	-26.0638	0	0	0	-610342	NM_011891	-	Sgcd
chr13	110584412	110584412	+	8.23e-06	0.000257556	-26.0555	0	0	1	-109605	NR_035442	+	Mir1904
chr18	37114202	37114202	+	9.21e-07	4.74e-05	-26.0468	0	1	1	1861	NM_007766	+	Pcdha4
chr2	170174790	170174790	+	0.000317768	0.0039112	-26.0382	0	1	0	-7071	NR_040610	+	Bcas1os2
chr8	87823522	87823522	+	2.38e-07	1.68e-05	-26.0371	1	0	0	-9	NM_019716	+	Orc6
chr19	50753439	50753439	+	4.46e-10	1.13e-07	-26.0353	1	0	0	-304	NM_001290356	-	Sorcs1
chr2	35992212	35992212	+	3.04e-06	0.00011877	-26.0351	1	1	0	13	NM_001159635	-	Rbm18
chr17	48073327	48073327	+	0.000110662	0.00181268	-26.033	0	0	0	-11747	NM_001110825	-	Foxp4
chr4	137230876	137230876	+	6.64e-06	0.000219868	-25.974	0	0	1	-6706	NM_001256218	+	Rap1gap
chr2	29035291	29035291	+	2.64e-06	0.000106144	-25.9546	0	1	0	54781	NM_198033	+	Setx
chr6	53770555	53770555	+	6.53e-06	0.000216783	-25.9369	1	1	0	265	NM_025817	-	Tril
chr15	83136100	83136100	+	3.5e-05	0.000771934	-25.9358	0	0	1	44578	NM_025445	-	Arfgap3
chr3	146476026	146476026	+	1.35e-08	1.79e-06	-25.9259	1	0	0	-117	NM_011100	-	Prkacb
chr6	67217432	67217432	+	1.83e-06	8.02e-05	-25.9058	1	0	1	461	NM_001113565	+	Serbp1
chr8	122136727	122136727	+	2.21e-06	9.2e-05	-25.889	1	1	0	82	NM_029428	+	Adad2
chr4	43434780	43434780	+	2.54e-07	1.76e-05	-25.8749	0	1	0	7227	NM_177377	-	Fam166b
chr13	65360465	65360465	+	1.04e-05	0.000308881	-25.8713	0	0	0	-19697	NM_178364	+	Zfp369
chr1	37047182	37047182	+	4.52e-11	1.83e-08	-25.8612	0	0	0	-50811	NM_018872	-	Tmem131
chr2	179777279	179777279	+	3.12e-06	0.000121664	-25.8547	1	1	0	93	NM_178750	+	Ss18l1
chr8	125201215	125201215	+	2.73e-07	1.86e-05	-25.8388	1	0	1	861	NM_001109873	-	Cbfa2t3
chr4	134685689	134685689	+	1.83e-05	0.000473373	-25.8259	0	0	1	9131	NM_019732	+	Runx3
chr4	129229181	129229181	+	4.89e-09	7.89e-07	-25.8012	0	0	1	5875	NR_106199	-	Mir8119
chr17	22153098	22153098	+	1.88e-07	1.4e-05	-25.7862	0	0	0	53574	NM_001025373	+	Zfp943
chr11	53292158	53292158	+	1.07e-06	5.37e-05	-25.782	0	1	0	1540	NM_183173	-	Sowaha
chrX	37364745	37364745	+	2.44e-08	2.84e-06	-25.7578	0	0	0	-147965	NM_001191032	-	Cypt14
chr12	45430070	45430070	+	2.06e-11	1e-08	-25.7576	1	1	0	200	NM_001146031	+	Nrcam
chr7	57230891	57230891	+	3.2e-06	0.000123606	-25.7555	1	0	1	173	NM_001037906	+	Nell1
chr9	111214623	111214623	+	6.87e-08	6.37e-06	-25.7478	1	1	0	382	NM_001164659	+	Trank1
chr11	3093483	3093483	+	2.8e-05	0.00065151	-25.7409	1	0	0	-18	NM_030207	-	Sfi1
chr9	53822645	53822645	+	3.08e-10	8.52e-08	-25.7257	1	0	1	464	NM_177769	-	Elmod1
chr11	101843450	101843450	+	3.61e-05	0.0007895	-25.7161	0	0	1	2656	NM_028207	-	Dusp3
chr18	80732626	80732626	+	6.78e-06	0.000222588	-25.7143	0	0	0	8660	NR_028424	-	Gm2176
chr4	107518839	107518839	+	2.6e-06	0.000104817	-25.7049	0	0	1	-33521	NM_001282737	+	Magoh
chr18	66098821	66098821	+	3.8e-06	0.000141055	-25.6931	1	0	0	-79	NM_013833	-	Rax
chr17	45838073	45838073	+	3.82e-08	4.02e-06	-25.6926	0	0	0	14754	NM_026732	+	Mrpl14
chr5	140371399	140371399	+	9.83e-08	8.37e-06	-25.6882	0	0	0	-12498	NM_175522	+	Elfn1
chr4	131399614	131399614	+	6.36e-06	0.00021208	-25.6233	1	0	1	230	NM_025297	+	Mecr
chr1	192208581	192208581	+	3.23e-11	1.4e-08	-25.6194	0	0	0	-214023	NM_008937	-	Prox1
chr13	24923834	24923834	+	6.77e-09	1.03e-06	-25.6076	1	0	1	308	NM_019551	+	Tdp2
chr11	101931907	101931907	+	2.45e-07	1.72e-05	-25.593	0	0	1	17923	NM_016695	-	Mpp2
chrX	147778874	147778874	+	6.15e-06	0.000206757	-25.5833	1	1	0	110	NM_198105	+	Fam120c
chr6	85911149	85911149	+	9.28e-06	0.000283082	-25.5599	1	0	1	513	NM_028099	-	Dusp11
chr5	116004126	116004126	+	1.34e-06	6.36e-05	-25.5522	0	1	0	-5350	NM_007475	+	Rplp0
chrX	91881898	91881898	+	2.12e-05	0.000527243	-25.5495	1	1	0	492	NM_008179	+	Gspt2
chr7	31741842	31741842	+	0.00061337	0.00634104	-25.5481	1	0	0	-21	NM_011680	-	Usf2
chr2	168287194	168287194	+	6.2e-09	9.53e-07	-25.5135	0	0	0	128672	NM_010899	-	Nfatc2
chr13	38114589	38114589	+	0.000148112	0.0022383	-25.5036	0	1	0	14218	NM_027724	-	Cage1
chr2	73111748	73111748	+	1.06e-05	0.000313436	-25.4917	0	1	0	1767	NM_001005343	+	Sp9
chr5	100728511	100728511	+	1.26e-07	1.02e-05	-25.4773	0	0	0	88802	NR_040679	+	2310034O05Rik
chr17	49154872	49154872	+	1.4e-06	6.58e-05	-25.4635	0	0	1	82967	NM_027452	+	Lrfn2
chr10	121078894	121078894	+	8.27e-07	4.34e-05	-25.4553	1	1	0	139	NM_177335	+	D930020B18Rik
chr15	78702002	78702002	+	6.26e-07	3.51e-05	-25.4414	0	0	0	-5618	NM_145929	+	Gga1
chr1	118866052	118866052	+	3.86e-05	0.00083152	-25.4386	0	0	0	1284340	NM_001077425	+	Cntnap5a
chr10	79805079	79805079	+	3.34e-05	0.00074433	-25.4318	0	1	0	6115	NR_104340	-	Adamtsl5
chr9	54134557	54134557	+	2.19e-07	1.58e-05	-25.4132	1	1	1	266	NM_177350	+	Gldn
chr2	71383401	71383401	+	1.35e-06	6.38e-05	-25.4073	0	0	1	1411	NM_010054	-	Dlx2
chr11	96055765	96055765	+	1.96e-05	0.00049897	-25.4007	1	1	0	92	NM_008267	+	Hoxb13
chr7	29830973	29830973	+	0.00024102	0.00319807	-25.3991	0	0	1	37741	NR_035489	-	Mir1963
chr15	83180780	83180780	+	5.41e-07	3.16e-05	-25.3928	1	0	0	-104	NM_025445	-	Arfgap3
chr8	37676549	37676549	+	1.2e-07	9.81e-06	-25.3721	1	0	1	449	NM_015802	-	Dlc1
chr7	100295872	100295872	+	8.15e-09	1.2e-06	-25.3707	0	0	0	67485	NM_021427	+	Fam181b
chr18	67449049	67449049	+	2.72e-09	4.91e-07	-25.3454	1	1	0	174	NM_053261	+	Impa2
chr8	125075926	125075926	+	0.000588178	0.00614628	-25.3353	1	0	0	-698	NM_001037298	-	Piezo1
chrX	7234592	7234592	+	7.18e-07	3.89e-05	-25.3338	1	1	0	89	NM_001290624	+	Prickle3
chr3	138434201	138434201	+	0.000179621	0.0025771	-25.3333	0	0	1	29031	NR_121195	+	Tspan5
chr11	32121654	32121654	+	2.37e-07	1.68e-05	-25.3218	1	0	1	640	NM_001291818	-	Rhbdf1
chr7	25877728	25877728	+	4.62e-09	7.56e-07	-25.3216	0	1	0	4467	NR_105855	-	Mir6537
chrX	55283709	55283709	+	3.76e-08	3.99e-06	-25.3142	1	0	0	-96	NM_009575	+	Zic3
chr2	30779663	30779663	+	1.93e-06	8.38e-05	-25.3035	0	0	0	-20847	NM_022415	-	Ptges
chr5	107447614	107447614	+	9.05e-08	7.91e-06	-25.2913	0	0	0	54036	NM_001271566	+	Cdc7
chr4	43053096	43053096	+	1.72e-07	1.3e-05	-25.2863	1	1	1	78	NM_001253354	-	Fam214b
chr2	75590717	75590717	+	1.98e-08	2.42e-06	-25.2786	0	0	0	-48020	NM_010902	-	Nfe2l2
chr10	79613084	79613084	+	1.87e-08	2.3e-06	-25.2632	0	0	1	2051	NM_021565	+	Midn
chr4	149605356	149605356	+	0.000257704	0.00335756	-25.2571	0	0	0	-5950	NM_023119	+	Eno1
chr19	24000444	24000444	+	6.44e-08	6.06e-06	-25.2549	0	0	1	105066	NM_001114174	-	Fam189a2
chr10	77441083	77441083	+	1.55e-05	0.00041929	-25.2437	1	0	0	-312	NM_026431	+	1810043G02Rik
chr9	44306283	44306283	+	2.6e-08	3e-06	-25.2393	1	0	0	-936	NM_030256	+	Bcl9l
chr6	52210142	52210142	+	6.06e-05	0.0011604	-25.2312	1	1	0	733	NM_008264	-	Hoxa13
chr11	68666776	68666776	+	1.25e-06	5.99e-05	-25.2126	1	0	0	-144	NM_023668	-	Ndel1
chr9	42747166	42747166	+	1.02e-07	8.59e-06	-25.2073	0	0	1	5289	NM_175481	-	Grik4
chr8	72406132	72406132	+	2.53e-08	2.92e-06	-25.1965	0	1	0	5160	NM_026818	-	Cilp2
chr3	108206474	108206474	+	1.41e-05	0.000389436	-25.1824	0	0	1	11939	NM_017392	-	Celsr2
chr3	123216108	123216108	+	4.59e-08	4.63e-06	-25.1822	0	0	0	-4855	NR_028574	-	Snhg8
chr5	24478531	24478531	+	5.55e-16	2.13e-12	-25.1799	0	0	1	-64205	NM_001170555	-	Prkag2
chr11	93644252	93644252	+	4.03e-05	0.000859334	-25.1693	0	0	0	102829	NM_001013375	-	Utp18
chr15	83136105	83136105	+	4.01e-05	0.000856648	-25.1665	0	0	1	44573	NM_025445	-	Arfgap3
chr2	32306716	32306716	+	9.39e-05	0.00159908	-25.1638	1	1	0	275	NM_146118	-	Slc25a25
chrX	34589118	34589118	+	2.57e-06	0.000103794	-25.1628	1	1	0	280	NM_173779	+	Sowahd
chr12	104639290	104639290	+	1.06e-08	1.46e-06	-25.1586	0	0	1	12400	NM_001177841	+	Otub2
chr1	88424015	88424015	+	1.19e-05	0.000342524	-25.1554	1	0	1	706	NM_008972	+	Ptma
chr10	41994972	41994972	+	8.08e-07	4.26e-05	-25.1538	0	1	0	1577	NM_019740	-	Foxo3
chr11	53292304	53292304	+	1.5e-14	3e-11	-25.1395	0	1	0	1394	NM_183173	-	Sowaha
chrX	58145724	58145724	+	8.7e-06	0.00026901	-25.1382	1	1	0	882	NM_009237	-	Sox3
chr4	104483841	104483841	+	8.05e-05	0.00142854	-25.0982	0	0	0	44921	NM_133882	+	C8b
chr11	68019618	68019618	+	1.08e-07	8.96e-06	-25.0965	0	1	0	-14776	NR_105833	+	Mir6406
chr19	45734308	45734308	+	9.16e-05	0.00156836	-25.0928	1	1	0	376	NM_013907	-	Fbxw4
chr14	13116777	13116777	+	7.3e-07	3.94e-05	-25.0772	1	1	1	62	NM_001284386	+	3830406C13Rik
chr8	123595428	123595428	+	6.37e-05	0.00120473	-25.0717	0	0	1	11505	NR_045471	-	Fendrr
chr2	163160673	163160673	+	6.68e-09	1.01e-06	-25.0638	0	0	0	63037	NM_021566	-	Jph2
chr4	125775477	125775477	+	2.28e-06	9.45e-05	-25.0632	0	1	0	1582	NM_001163266	+	Lsm10
chr15	12431991	12431991	+	7.47e-06	0.00023942	-25.0622	0	0	1	90321	NM_001081064	-	Pdzd2
chr12	85292360	85292360	+	3.08e-05	0.000700761	-25.0563	1	1	0	804	NM_023633	+	2410016O06Rik
chr17	45873810	45873810	+	0.000398336	0.00461259	-25.0505	0	0	0	-3018	NM_028164	-	1600014C23Rik
chr5	143700144	143700144	+	8.26e-07	4.34e-05	-25.047	0	0	0	-21890	NM_007984	+	Fscn1
chr15	77136673	77136673	+	1.02e-07	8.61e-06	-25.0436	1	0	1	811	NM_175387	-	Rbfox2
chr5	96803748	96803748	+	1.25e-07	1.01e-05	-25.0204	1	1	0	776	NM_175473	+	Fras1
